# Supplementary material for: Some poleward movement of British native vascular plants is occurring, but the fingerprint of climate change is not evident
Source: PeerJ journal article supplement (doi:10.7717/peerj.77), 2013-05-28
Supplement: supporting table S1.pdf [file supporting%20table%20S1.pdf]

| Taxon                            | southern England    |               |        |                | northern England    |               |        |                | Wales               |               |        |                | Scotland            |               |        |                |
|----------------------------------|---------------------|---------------|--------|----------------|---------------------|---------------|--------|----------------|---------------------|---------------|--------|----------------|---------------------|---------------|--------|----------------|
|                                  | Direction (degrees) | Distance (km) | Change | Mean Occupancy | Direction (degrees) | Distance (km) | Change | Mean Occupancy | Direction (degrees) | Distance (km) | Change | Mean Occupancy | Direction (degrees) | Distance (km) | Change | Mean Occupancy |
| <i>Acer campestre</i>            | 74                  | 2.1           | -0.071 | 0.123          | 322                 | 36.1          | 0.123  | 0.123          | 288                 | 30.7          | -0.058 | 0.058          | 143                 | 11.6          | -0.003 | 0.003          |
| <i>Achillea millefolium</i>      | 119                 | 0.2           | -0.006 | 0.021          | 27                  | 0.9           | -0.021 | 0.021          | 8                   | 1.6           | -0.019 | 0.019          | 116                 | 1.5           | -0.037 | 0.037          |
| <i>Achillea ptarmica</i>         | 226                 | 22.5          | -0.041 | 0.120          | 333                 | 3.9           | -0.120 | 0.120          | 50                  | 2.4           | -0.008 | 0.008          | 353                 | 5.3           | -0.033 | 0.033          |
| <i>Adiantum capillus-veneris</i> | 83                  | 5.3           | -0.001 | 0.001          |                     |               |        |                |                     |               |        |                |                     |               |        |                |
| <i>Adoxa moschatellina</i>       | 137                 | 6.6           | -0.008 | 0.023          | 314                 | 10.7          | -0.023 | 0.023          | 255                 | 4.4           | -0.101 | 0.101          | 107                 | 18.6          | -0.038 | 0.038          |
| <i>Aethusa cynapium</i>          | 56                  | 13.9          | -0.019 | 0.046          | 262                 | 1.1           | 0.046  | 0.046          | 196                 | 2.2           | -0.011 | 0.011          | 19                  | 9.6           | -0.005 | 0.005          |
| <i>Agrimonia eupatoria</i>       | 103                 | 6.5           | -0.027 | 0.010          | 279                 | 20.6          | 0.010  | 0.010          | 163                 | 0.9           | -0.131 | 0.131          | 143                 | 9.7           | -0.009 | 0.009          |
| <i>Agrimonia procera</i>         | 115                 | 23.2          | -0.003 | 0.003          |                     |               |        |                | 255                 | 1.3           | -0.026 | 0.026          | 277                 | 3.6           | -0.003 | 0.003          |
| <i>Agrostis capillaris</i>       | 308                 | 1.7           | -0.055 | 0.167          | 298                 | 4.6           | -0.167 | 0.167          | 69                  | 0.5           | -0.059 | 0.059          | 319                 | 0.5           | -0.013 | 0.013          |
| <i>Agrostis curtisii</i>         | 231                 | 65.9          | -0.010 | 0.010          |                     |               |        |                |                     |               |        |                |                     |               |        |                |
| <i>Agrostis stolonifera</i>      | 254                 | 0.6           | -0.037 | 0.004          | 136                 | 0.6           | 0.004  | 0.004          | 200                 | 4.4           | -0.004 | 0.004          | 2                   | 3.0           | -0.017 | 0.017          |
| <i>Aira caryophylla</i>          | 241                 | 28.2          | -0.018 | 0.021          | 16                  | 6.3           | -0.021 | 0.021          | 181                 | 13.4          | -0.042 | 0.042          | 343                 | 4.9           | -0.028 | 0.028          |
| <i>Aira praecox</i>              | 116                 | 12.3          | -0.013 | 0.037          | 138                 | 19.8          | -0.037 | 0.037          | 355                 | 9.0           | -0.149 | 0.149          | 351                 | 4.2           | -0.001 | 0.001          |
| <i>Ajuga pyramidalis</i>         |                     |               |        |                |                     |               |        |                |                     |               |        |                | 334                 | 18.7          | -0.008 | 0.008          |
| <i>Ajuga reptans</i>             | 159                 | 1.9           | -0.012 | 0.070          | 328                 | 20.0          | -0.070 | 0.070          | 343                 | 11.6          | -0.156 | 0.156          | 184                 | 5.4           | -0.019 | 0.019          |
| <i>Alchemilla alpina</i>         |                     |               |        |                |                     |               |        |                |                     |               |        |                | 175                 | 26.2          | -0.085 | 0.085          |
| <i>Alchemilla filicaulis</i>     | 246                 | 11.2          | -0.023 | 0.061          | 194                 | 1.3           | -0.061 | 0.061          | 185                 | 46.2          | -0.072 | 0.072          | 112                 | 4.6           | -0.016 | 0.016          |
| <i>Alisma lanceolatum</i>        | 31                  | 6.0           | -0.006 | 0.006          |                     |               |        |                |                     |               |        |                |                     |               |        |                |
| <i>Alisma plantago-aquatica</i>  | 167                 | 3.5           | -0.036 | 0.081          | 165                 | 8.8           | 0.081  | 0.081          | 198                 | 10.5          | -0.041 | 0.041          | 17                  | 13.0          | -0.008 | 0.008          |
| <i>Alliaria petiolata</i>        | 53                  | 0.7           | -0.036 | 0.057          | 38                  | 2.7           | 0.057  | 0.057          | 54                  | 10.1          | -0.029 | 0.029          | 288                 | 9.2           | -0.030 | 0.030          |
| <i>Allium oleraceum</i>          | 306                 | 12.6          | -0.002 | 0.003          | 345                 | 2.4           | 0.003  | 0.003          |                     |               |        |                |                     |               |        |                |
| <i>Allium schoenoprasum</i>      | 30                  | 40.1          | -0.008 | 0.010          | 97                  | 1.8           | 0.010  | 0.010          |                     |               |        |                |                     |               |        |                |
| <i>Allium scorodoprasum</i>      |                     |               |        |                |                     |               |        |                |                     |               |        |                |                     |               |        |                |
| <i>Allium ursinum</i>            | 139                 | 5.2           | -0.068 | 0.039          | 328                 | 15.4          | -0.039 | 0.039          | 126                 | 2.1           | -0.072 | 0.072          | 184                 | 10.9          | -0.023 | 0.023          |
| <i>Allium vineale</i>            | 212                 | 8.5           | -0.058 | 0.037          | 20                  | 4.1           | 0.037  | 0.037          | 346                 | 14.5          | -0.026 | 0.026          | 135                 | 2.8           | -0.003 | 0.003          |
| <i>Alnus glutinosa</i>           | 144                 | 0.1           | -0.072 | 0.018          | 357                 | 0.6           | -0.018 | 0.018          | 96                  | 3.9           | -0.127 | 0.127          | 171                 | 7.5           | -0.009 | 0.009          |
| <i>Alopecurus aequalis</i>       | 217                 | 16.5          | -0.001 | 0.001          |                     |               |        |                |                     |               |        |                |                     |               |        |                |
| <i>Alopecurus bulbosus</i>       | 144                 | 14.5          | -0.001 | 0.001          |                     |               |        |                |                     |               |        |                |                     |               |        |                |
| <i>Alopecurus geniculatus</i>    | 226                 | 3.8           | -0.043 | 0.102          | 282                 | 1.1           | -0.102 | 0.102          | 346                 | 2.9           | -0.014 | 0.014          | 333                 | 2.4           | -0.047 | 0.047          |
| <i>Alopecurus pratensis</i>      | 58                  | 8.5           | -0.039 | 0.067          | 302                 | 0.8           | -0.067 | 0.067          | 10                  | 2.6           | -0.194 | 0.194          | 344                 | 14.5          | -0.055 | 0.055          |
| <i>Althaea officinalis</i>       | 120                 | 53.5          | -0.003 | 0.003          |                     |               |        |                |                     |               |        |                |                     |               |        |                |
| <i>Anacamptis morio</i>          | 159                 | 6.5           | -0.012 | 0.007          | 291                 | 2.4           | -0.007 | 0.007          | 51                  | 1.4           | -0.020 | 0.020          |                     |               |        |                |
| <i>Anacamptis pyramidalis</i>    | 207                 | 5.4           | -0.039 | 0.028          | 76                  | 13.7          | 0.028  | 0.028          | 196                 | 4.3           | -0.060 | 0.060          |                     |               |        |                |
| <i>Anagallis arvensis</i>        | 111                 | 7.2           | -0.021 | 0.086          | 303                 | 6.4           | 0.086  | 0.086          | 301                 | 2.9           | -0.135 | 0.135          | 166                 | 4.8           | -0.004 | 0.004          |
| <i>Anagallis tenella</i>         | 256                 | 31.1          | -0.020 | 0.040          | 212                 | 2.7           | -0.040 | 0.040          | 266                 | 9.8           | -0.002 | 0.002          | 273                 | 23.5          | -0.004 | 0.004          |
| <i>Andromeda polifolia</i>       |                     |               |        |                | 304                 | 1.9           | 0.002  | 0.002          |                     |               |        |                |                     |               |        |                |
| <i>Anemone nemorosa</i>          | 211                 | 7.7           | -0.002 | 0.131          | 321                 | 17.2          | -0.131 | 0.131          | 71                  | 9.9           | -0.052 | 0.052          | 211                 | 2.5           | -0.046 | 0.046          |
| <i>Angelica sylvestris</i>       | 35                  | 3.3           | -0.026 | 0.098          | 309                 | 5.1           | -0.098 | 0.098          | 333                 | 1.6           | -0.057 | 0.057          | 299                 | 1.0           | -0.001 | 0.001          |
| <i>Antennaria dioica</i>         |                     |               |        |                |                     |               |        |                |                     |               |        |                | 326                 | 14.4          | -0.009 | 0.009          |
| <i>Anthoxanthum odoratum</i>     | 74                  | 0.8           | -0.027 | 0.107          | 320                 | 2.9           | -0.107 | 0.107          | 303                 | 0.2           | -0.022 | 0.022          | 330                 | 1.4           | -0.034 | 0.034          |
| <i>Anthriscus caucalis</i>       | 175                 | 13.5          | -0.038 | 0.038          |                     |               |        |                |                     |               |        |                |                     |               |        |                |
| <i>Anthriscus sylvestris</i>     | 48                  | 1.8           | -0.013 | 0.042          | 342                 | 3.6           | 0.042  | 0.042          | 17                  | 7.1           | -0.064 | 0.064          | 334                 | 33.9          | -0.051 | 0.051          |
| <i>Anthyllis vulneraria</i>      | 243                 | 5.5           | -0.034 | 0.058          | 348                 | 17.9          | -0.058 | 0.058          | 247                 | 18.1          | -0.042 | 0.042          | 356                 | 8.0           | -0.044 | 0.044          |
| <i>Apium graveolens</i>          | 250                 | 17.5          | -0.001 | 0.006          | 26                  | 3.3           | 0.006  | 0.006          |                     |               |        |                |                     |               |        |                |
| <i>Apium inundatum</i>           | 258                 | 1.7           | -0.007 | 0.001          | 141                 | 0.8           | -0.001 | 0.001          | 153                 | 1.4           | -0.013 | 0.013          | 132                 | 11.0          | -0.017 | 0.017          |
| <i>Apium nodiflorum</i>          | 307                 | 2.7           | -0.015 | 0.146          | 163                 | 19.7          | 0.146  | 0.146          | 301                 | 1.6           | -0.122 | 0.122          | 205                 | 7.9           | -0.017 | 0.017          |

|                                |     |       |        |     |      |        |     |      |        |     |      |        |
|--------------------------------|-----|-------|--------|-----|------|--------|-----|------|--------|-----|------|--------|
| <i>Aquilegia vulgaris</i>      | 158 | 0.7   | -0.123 | 163 | 5.6  | 0.091  | 6   | 1.4  | -0.062 | 12  | 8.9  | 0.006  |
| <i>Arabidopsis petraea</i>     |     |       |        |     |      |        |     |      |        | 295 | 28.9 | 0.001  |
| <i>Arabidopsis thaliana</i>    | 167 | 3.4   | -0.064 | 266 | 3.8  | 0.187  | 274 | 5.0  | 0.071  | 10  | 16.1 | 0.024  |
| <i>Arabis hirsuta</i>          | 18  | 11.6  | -0.015 | 336 | 2.5  | -0.014 | 174 | 3.9  | 0.007  | 231 | 0.4  | -0.010 |
| <i>Arctostaphylos alpinus</i>  |     |       |        |     |      |        |     |      |        | 43  | 3.2  | -0.008 |
| <i>Arctostaphylos uva-ursi</i> |     |       |        |     |      |        |     |      |        | 349 | 16.6 | -0.007 |
| <i>Arenaria serpyllifolia</i>  | 23  | 0.4   | -0.032 | 26  | 2.0  | -0.018 | 146 | 10.5 | 0.013  | 28  | 3.8  | -0.004 |
| <i>Armeria maritima</i>        | 56  | 53.0  | 0.019  | 35  | 5.6  | 0.021  | 347 | 7.4  | 0.056  | 328 | 17.3 | 0.025  |
| <i>Arrhenatherum elatius</i>   | 23  | 0.5   | 0.020  | 345 | 1.4  | 0.024  | 312 | 0.2  | 0.025  | 346 | 8.0  | 0.046  |
| <i>Arum italicum</i>           | 76  | 6.9   | 0.004  | 11  | 2.5  | 0.014  | 334 | 1.2  | 0.051  |     |      |        |
| <i>Arum maculatum</i>          | 120 | 1.4   | 0.016  | 337 | 8.9  | -0.012 | 213 | 6.4  | -0.058 | 85  | 12.1 | 0.000  |
| <i>Asperula cynanchica</i>     | 224 | 12.6  | -0.015 |     |      |        |     |      |        |     |      |        |
| <i>Asplenium ceterach</i>      | 246 | 43.8  | 0.010  | 33  | 2.1  | 0.007  | 152 | 3.4  | -0.040 |     |      |        |
| <i>Asplenium obovatum</i>      | 239 | 132.5 | -0.005 |     |      |        |     |      |        |     |      |        |
| <i>Asplenium ruta-muraria</i>  | 242 | 15.9  | -0.047 | 319 | 4.4  | 0.142  | 194 | 1.0  | -0.075 | 4   | 1.1  | 0.044  |
| <i>Asplenium scolopendrium</i> | 162 | 2.6   | -0.129 | 306 | 3.2  | 0.189  | 208 | 2.2  | -0.063 | 185 | 4.9  | -0.019 |
| <i>Asplenium trichomanes</i>   | 66  | 28.9  | -0.123 | 344 | 6.2  | 0.060  | 6   | 0.7  | -0.025 | 246 | 5.4  | -0.007 |
| <i>Asplenium viride</i>        |     |       |        |     |      |        |     |      |        | 148 | 19.4 | -0.017 |
| <i>Astragalus danicus</i>      | 52  | 61.2  | -0.006 | 6   | 2.6  | 0.011  |     |      |        | 41  | 8.3  | 0.010  |
| <i>Astragalus glycyphyllos</i> | 56  | 14.8  | -0.002 |     |      |        |     |      |        |     |      |        |
| <i>Athyrium distentifolium</i> |     |       |        |     |      |        |     |      |        | 122 | 1.5  | -0.008 |
| <i>Athyrium filix-femina</i>   | 250 | 30.3  | -0.022 | 319 | 29.4 | -0.090 | 48  | 0.1  | 0.015  | 220 | 4.0  | -0.047 |
| <i>Atriplex littoralis</i>     | 342 | 30.2  | -0.066 | 235 | 0.4  | 0.064  |     |      |        | 105 | 20.9 | 0.012  |
| <i>Atriplex patula</i>         | 69  | 13.5  | 0.005  | 169 | 4.7  | 0.015  | 228 | 6.4  | -0.044 | 330 | 22.9 | 0.032  |
| <i>Atriplex prostrata</i>      | 59  | 4.8   | -0.150 | 144 | 2.2  | 0.229  | 44  | 4.7  | 0.126  | 24  | 15.8 | 0.051  |
| <i>Atropa belladonna</i>       | 63  | 16.6  | 0.004  |     |      |        |     |      |        |     |      |        |
| <i>Avenula pratensis</i>       | 261 | 5.3   | -0.022 | 342 | 41.1 | 0.024  |     |      |        | 125 | 16.6 | 0.000  |
| <i>Avenula pubescens</i>       | 249 | 0.3   | -0.046 | 344 | 11.9 | 0.008  | 251 | 18.6 | 0.011  | 298 | 4.6  | -0.003 |
| <i>Baldellia ranunculoides</i> | 38  | 12.6  | 0.006  |     |      |        | 196 | 71.6 | 0.030  | 206 | 4.6  | -0.009 |
| <i>Barbarea vulgaris</i>       | 184 | 6.3   | -0.010 | 348 | 1.2  | 0.039  | 271 | 12.4 | -0.134 | 72  | 10.2 | -0.019 |
| <i>Bellis perennis</i>         | 54  | 0.9   | 0.007  | 311 | 0.7  | -0.002 | 356 | 0.8  | -0.031 | 38  | 1.1  | 0.023  |
| <i>Berberis vulgaris</i>       | 53  | 7.9   | -0.003 | 315 | 5.4  | -0.009 |     |      |        | 107 | 8.8  | -0.005 |
| <i>Berula erecta</i>           | 53  | 19.0  | 0.017  | 267 | 2.0  | 0.017  | 0   | 31.2 | 0.009  | 28  | 18.7 | -0.003 |
| <i>Beta vulgaris</i>           | 35  | 46.9  | -0.057 | 131 | 13.3 | 0.022  | 262 | 10.7 | 0.102  | 200 | 5.9  | 0.002  |
| <i>Betonica officinalis</i>    | 234 | 34.9  | -0.096 | 291 | 5.9  | -0.085 | 170 | 5.0  | -0.121 |     |      |        |
| <i>Betula nana</i>             |     |       |        |     |      |        |     |      |        | 15  | 1.5  | -0.007 |
| <i>Betula pendula</i>          | 174 | 2.1   | -0.068 | 279 | 4.6  | 0.033  | 48  | 11.0 | -0.039 | 68  | 9.6  | -0.027 |
| <i>Betula pubescens</i>        | 318 | 7.1   | -0.038 | 302 | 4.0  | -0.051 | 98  | 1.5  | -0.015 | 231 | 1.3  | -0.009 |
| <i>Bidens cernua</i>           | 228 | 6.4   | -0.012 |     |      |        | 236 | 22.3 | -0.004 |     |      |        |
| <i>Bidens tripartita</i>       | 194 | 4.3   | -0.016 | 359 | 1.3  | 0.014  | 178 | 13.0 | -0.031 |     |      |        |
| <i>Blackstonia perfoliata</i>  | 149 | 8.2   | -0.013 | 332 | 12.6 | 0.056  | 170 | 6.9  | 0.033  |     |      |        |
| <i>Blechnum spicant</i>        | 236 | 71.0  | -0.006 | 318 | 28.4 | -0.078 | 63  | 5.7  | -0.044 | 267 | 4.7  | 0.036  |
| <i>Blysmus compressus</i>      | 32  | 7.8   | 0.000  | 347 | 3.6  | 0.000  |     |      |        |     |      |        |
| <i>Botrychium lunaria</i>      | 254 | 9.8   | -0.001 | 3   | 5.2  | -0.024 |     |      |        | 14  | 3.3  | 0.029  |
| <i>Brachypodium sylvaticum</i> | 65  | 3.7   | -0.072 | 319 | 12.9 | 0.110  | 279 | 3.6  | -0.079 | 242 | 3.4  | 0.022  |
| <i>Brassica nigra</i>          | 149 | 5.2   | -0.032 | 155 | 16.5 | 0.022  | 270 | 3.0  | 0.034  |     |      |        |
| <i>Brassica oleracea</i>       | 71  | 13.4  | 0.004  |     |      |        |     |      |        |     |      |        |
| <i>Briza media</i>             | 89  | 3.1   | -0.037 | 320 | 7.5  | -0.109 | 118 | 2.9  | -0.071 | 133 | 37.2 | -0.032 |
| <i>Bromopsis erecta</i>        | 233 | 8.3   | -0.031 | 111 | 32.7 | -0.004 |     |      |        |     |      |        |
| <i>Bromopsis ramosa</i>        | 174 | 5.0   | -0.039 | 314 | 9.5  | -0.033 | 247 | 9.4  | -0.167 | 26  | 18.0 | -0.011 |

|                                |     |      |        |     |      |        |     |      |        |     |      |        |
|--------------------------------|-----|------|--------|-----|------|--------|-----|------|--------|-----|------|--------|
| <i>Bromus commutatus</i>       | 272 | 11.1 | 0.051  |     |      |        |     |      |        |     |      |        |
| <i>Bromus hordeaceus</i>       | 65  | 7.5  | 0.067  | 150 | 6.5  | 0.135  | 354 | 1.9  | -0.054 | 57  | 3.7  | 0.020  |
| <i>Bromus racemosus</i>        | 103 | 13.5 | 0.027  |     |      |        |     |      |        |     |      |        |
| <i>Bryonia dioica</i>          | 57  | 26.6 | 0.020  | 144 | 43.9 | 0.090  |     |      |        |     |      |        |
| <i>Bupleurum tenuissimum</i>   | 158 | 54.3 | 0.003  |     |      |        |     |      |        |     |      |        |
| <i>Butomus umbellatus</i>      | 252 | 10.9 | -0.014 | 22  | 1.1  | 0.030  |     |      |        |     |      |        |
| <i>Buxus sempervirens</i>      | 60  | 8.7  | 0.001  | 109 | 7.1  | 0.037  | 25  | 4.6  | -0.010 | 120 | 20.3 | 0.006  |
| <i>Calamagrostis canescens</i> | 189 | 26.1 | -0.001 | 67  | 1.9  | 0.041  |     |      |        |     |      |        |
| <i>Calamagrostis epigejos</i>  | 52  | 36.6 | 0.047  | 122 | 4.2  | 0.027  |     |      |        |     |      |        |
| <i>Calluna vulgaris</i>        | 240 | 24.6 | -0.039 | 311 | 23.2 | -0.165 | 348 | 2.9  | 0.005  | 332 | 3.8  | 0.018  |
| <i>Caltha palustris</i>        | 60  | 2.3  | -0.016 | 324 | 8.0  | -0.131 | 354 | 2.5  | -0.087 | 155 | 1.0  | -0.070 |
| <i>Calystegia sepium</i>       | 62  | 3.9  | 0.031  | 174 | 4.6  | 0.277  | 285 | 1.0  | -0.027 | 6   | 11.3 | 0.057  |
| <i>Campanula glomerata</i>     | 343 | 16.0 | -0.037 | 305 | 3.0  | 0.003  |     |      |        |     |      |        |
| <i>Campanula latifolia</i>     | 30  | 38.0 | -0.009 | 343 | 17.4 | -0.051 |     |      |        | 20  | 13.2 | 0.023  |
| <i>Campanula patula</i>        | 304 | 34.7 | 0.000  |     |      |        |     |      |        |     |      |        |
| <i>Campanula trachelium</i>    | 100 | 7.5  | -0.022 |     |      |        |     |      |        |     |      |        |
| <i>Cardamine amara</i>         | 36  | 26.7 | 0.007  | 311 | 23.8 | 0.043  |     |      |        | 145 | 6.9  | 0.020  |
| <i>Cardamine bulbifera</i>     | 139 | 43.2 | 0.003  |     |      |        |     |      |        |     |      |        |
| <i>Cardamine flexuosa</i>      | 78  | 5.5  | 0.072  | 333 | 0.2  | -0.041 | 329 | 1.0  | -0.125 | 325 | 1.3  | 0.019  |
| <i>Cardamine hirsuta</i>       | 96  | 3.9  | 0.107  | 81  | 2.9  | 0.011  | 66  | 0.8  | -0.018 | 90  | 6.4  | -0.079 |
| <i>Cardamine impatiens</i>     | 177 | 4.8  | 0.002  |     |      |        |     |      |        |     |      |        |
| <i>Cardamine pratensis</i>     | 221 | 4.3  | -0.019 | 305 | 6.7  | -0.131 | 266 | 2.4  | -0.093 | 2   | 0.9  | 0.022  |
| <i>Carduus crispus</i>         | 66  | 15.9 | -0.058 | 135 | 8.6  | 0.092  | 94  | 2.2  | -0.076 | 63  | 6.9  | 0.011  |
| <i>Carduus nutans</i>          | 130 | 3.7  | -0.046 | 300 | 15.7 | -0.009 | 204 | 62.6 | 0.016  |     |      |        |
| <i>Carduus tenuiflorus</i>     | 36  | 39.1 | 0.029  |     |      |        | 281 | 9.7  | 0.002  | 348 | 58.9 | 0.006  |
| <i>Carex acuta</i>             | 80  | 3.4  | -0.014 | 339 | 4.6  | 0.010  |     |      |        |     |      |        |
| <i>Carex acutiformis</i>       | 356 | 4.2  | -0.008 | 315 | 2.7  | 0.057  | 2   | 12.7 | -0.027 | 168 | 7.5  | 0.006  |
| <i>Carex aquatilis</i>         |     |      |        |     |      |        |     |      |        | 154 | 19.5 | -0.004 |
| <i>Carex atrata</i>            |     |      |        |     |      |        |     |      |        | 205 | 46.6 | 0.001  |
| <i>Carex bigelowii</i>         |     |      |        |     |      |        |     |      |        | 197 | 15.5 | 0.000  |
| <i>Carex binervis</i>          | 46  | 20.9 | 0.022  | 312 | 8.8  | -0.073 | 307 | 5.5  | 0.094  | 163 | 3.4  | 0.046  |
| <i>Carex canescens</i>         | 111 | 4.3  | -0.006 | 129 | 37.6 | -0.005 | 324 | 10.5 | 0.006  | 256 | 3.2  | -0.063 |
| <i>Carex capillaris</i>        |     |      |        |     |      |        |     |      |        | 179 | 34.0 | 0.010  |
| <i>Carex caryophylla</i>       | 236 | 27.5 | 0.020  | 145 | 10.6 | -0.066 | 345 | 5.2  | 0.033  | 153 | 9.0  | -0.060 |
| <i>Carex diandra</i>           |     |      |        |     |      |        |     |      |        | 112 | 13.4 | 0.003  |
| <i>Carex dioica</i>            |     |      |        | 307 | 32.4 | -0.005 | 337 | 28.4 | 0.017  | 330 | 12.4 | 0.036  |
| <i>Carex disticha</i>          | 279 | 11.1 | 0.018  | 330 | 2.9  | 0.012  |     |      |        | 147 | 23.1 | 0.015  |
| <i>Carex divisa</i>            | 293 | 39.6 | -0.003 |     |      |        |     |      |        |     |      |        |
| <i>Carex divulsa</i>           | 190 | 9.4  | 0.212  |     |      |        |     |      |        |     |      |        |
| <i>Carex echinata</i>          | 245 | 80.5 | -0.023 | 261 | 2.9  | -0.082 | 302 | 2.3  | 0.000  | 225 | 2.6  | 0.029  |
| <i>Carex elata</i>             | 55  | 78.1 | 0.010  | 44  | 21.5 | 0.009  |     |      |        |     |      |        |
| <i>Carex flacca</i>            | 221 | 1.9  | 0.055  | 326 | 3.8  | -0.008 | 253 | 0.9  | 0.218  | 6   | 2.6  | 0.003  |
| <i>Carex hirta</i>             | 194 | 1.9  | 0.064  | 166 | 2.4  | 0.151  | 333 | 7.1  | 0.082  | 353 | 16.1 | 0.008  |
| <i>Carex hostiana</i>          | 241 | 24.7 | 0.010  | 161 | 5.1  | -0.048 | 248 | 14.3 | 0.019  | 304 | 7.5  | 0.016  |
| <i>Carex humilis</i>           | 11  | 34.4 | -0.005 |     |      |        |     |      |        |     |      |        |
| <i>Carex laevigata</i>         | 238 | 24.8 | 0.002  | 324 | 26.3 | -0.026 | 213 | 2.2  | -0.035 | 198 | 6.4  | 0.004  |
| <i>Carex lasiocarpa</i>        |     |      |        |     |      |        |     |      |        | 162 | 8.2  | 0.018  |
| <i>Carex leporina</i>          | 46  | 3.2  | 0.026  | 302 | 19.9 | -0.086 | 1   | 4.3  | -0.012 | 227 | 0.8  | 0.019  |
| <i>Carex limosa</i>            |     |      |        |     |      |        |     |      |        | 239 | 1.3  | -0.003 |
| <i>Carex magellanica</i>       |     |      |        |     |      |        |     |      |        | 14  | 59.1 | 0.009  |



|                                  |     |      |        |     |      |        |     |      |        |     |      |        |
|----------------------------------|-----|------|--------|-----|------|--------|-----|------|--------|-----|------|--------|
| <i>Cirsium acaule</i>            | 163 | 9.6  | -0.032 |     |      |        |     |      |        |     |      |        |
| <i>Cirsium arvense</i>           | 47  | 0.8  | 0.003  | 355 | 1.1  | 0.002  | 6   | 1.6  | 0.001  | 78  | 2.9  | 0.002  |
| <i>Cirsium dissectum</i>         | 262 | 13.7 | 0.002  |     |      |        |     |      |        |     |      |        |
| <i>Cirsium eriophorum</i>        | 285 | 21.1 | -0.005 | 294 | 6.5  | -0.020 |     |      |        |     |      |        |
| <i>Cirsium heterophyllum</i>     |     |      |        | 331 | 41.6 | 0.030  |     |      |        | 358 | 16.1 | 0.006  |
| <i>Cirsium palustre</i>          | 245 | 2.5  | -0.046 | 314 | 14.8 | -0.146 | 29  | 1.2  | -0.020 | 354 | 1.7  | -0.006 |
| <i>Cirsium vulgare</i>           | 51  | 0.7  | 0.007  | 339 | 0.2  | 0.023  | 35  | 1.0  | -0.045 | 6   | 5.5  | 0.044  |
| <i>Cladium mariscus</i>          | 56  | 79.8 | 0.011  |     |      |        |     |      |        | 298 | 1.4  | -0.005 |
| <i>Clematis vitalba</i>          | 148 | 2.2  | 0.030  | 81  | 1.5  | 0.027  | 158 | 12.6 | -0.044 |     |      |        |
| <i>Clinopodium acinos</i>        | 69  | 12.6 | -0.031 |     |      |        |     |      |        |     |      |        |
| <i>Clinopodium ascendens</i>     | 56  | 2.3  | 0.013  |     |      |        |     |      |        |     |      |        |
| <i>Clinopodium calamintha</i>    | 257 | 84.3 | -0.001 |     |      |        |     |      |        |     |      |        |
| <i>Clinopodium vulgare</i>       | 134 | 5.2  | -0.035 | 310 | 4.7  | 0.010  | 36  | 0.9  | -0.105 | 114 | 19.4 | -0.001 |
| <i>Cochlearia danica</i>         | 40  | 72.4 | 0.156  | 112 | 4.5  | 0.164  | 356 | 5.4  | 0.121  | 60  | 16.1 | 0.021  |
| <i>Coeloglossum viride</i>       | 209 | 28.1 | -0.012 | 323 | 3.0  | -0.001 |     |      |        | 6   | 0.5  | 0.002  |
| <i>Colchicum autumnale</i>       | 297 | 20.4 | -0.011 |     |      |        |     |      |        |     |      |        |
| <i>Comarum palustre</i>          | 42  | 53.5 | 0.011  | 329 | 5.0  | -0.040 | 28  | 29.5 | 0.092  | 323 | 1.0  | -0.027 |
| <i>Conopodium majus</i>          | 211 | 1.4  | -0.043 | 322 | 16.4 | -0.197 | 38  | 2.4  | -0.091 | 248 | 1.8  | -0.064 |
| <i>Convallaria majalis</i>       | 66  | 18.1 | 0.005  | 165 | 0.7  | -0.007 |     |      |        |     |      |        |
| <i>Convolvulus arvensis</i>      | 81  | 17.6 | -0.012 | 125 | 8.5  | 0.073  | 198 | 5.0  | -0.107 | 21  | 6.5  | -0.020 |
| <i>Corallorhiza trifida</i>      |     |      |        |     |      |        |     |      |        | 316 | 34.8 | 0.002  |
| <i>Cornus sanguinea</i>          | 103 | 9.4  | 0.038  | 327 | 1.5  | 0.137  | 293 | 33.1 | -0.028 |     |      |        |
| <i>Cornus suecica</i>            |     |      |        |     |      |        |     |      |        | 155 | 3.1  | -0.008 |
| <i>Corylus avellana</i>          | 74  | 4.9  | 0.058  | 175 | 1.0  | 0.094  | 140 | 4.2  | -0.038 | 109 | 2.6  | 0.057  |
| <i>Crassula tillaea</i>          | 72  | 62.2 | 0.014  |     |      |        |     |      |        |     |      |        |
| <i>Crataegus laevigata</i>       | 253 | 26.9 | -0.017 | 155 | 21.4 | 0.032  |     |      |        |     |      |        |
| <i>Crataegus monogyna</i>        | 49  | 0.1  | -0.005 | 338 | 3.1  | 0.025  | 59  | 0.1  | -0.008 | 73  | 1.9  | -0.031 |
| <i>Crepis biennis</i>            | 101 | 1.6  | -0.015 | 285 | 6.4  | 0.016  |     |      |        |     |      |        |
| <i>Crepis capillaris</i>         | 110 | 2.1  | 0.030  | 176 | 4.4  | 0.044  | 332 | 2.1  | 0.003  | 29  | 4.8  | 0.016  |
| <i>Crepis paludosa</i>           |     |      |        | 148 | 5.5  | -0.093 | 15  | 44.7 | -0.024 | 177 | 12.0 | -0.079 |
| <i>Cruciata laevipes</i>         | 176 | 9.3  | -0.021 | 241 | 4.1  | -0.024 | 216 | 16.3 | -0.128 | 355 | 19.4 | -0.005 |
| <i>Cryptogramma crispa</i>       |     |      |        |     |      |        | 25  | 2.6  | 0.015  | 180 | 31.4 | 0.006  |
| <i>Cuscuta epithymum</i>         | 196 | 12.9 | -0.003 |     |      |        |     |      |        |     |      |        |
| <i>Cuscuta europaea</i>          | 300 | 16.3 | 0.003  |     |      |        |     |      |        |     |      |        |
| <i>Cynoglossum officinale</i>    | 102 | 23.2 | 0.010  | 102 | 4.9  | 0.010  |     |      |        |     |      |        |
| <i>Cynosurus cristatus</i>       | 52  | 0.5  | -0.048 | 324 | 3.6  | -0.127 | 234 | 2.2  | 0.012  | 341 | 3.9  | 0.001  |
| <i>Cyperus longus</i>            | 246 | 3.7  | 0.007  |     |      |        |     |      |        |     |      |        |
| <i>Cystopteris fragilis</i>      | 291 | 56.1 | 0.009  | 126 | 8.7  | -0.026 |     |      |        | 135 | 6.4  | -0.035 |
| <i>Cytisus scoparius</i>         | 92  | 9.3  | -0.022 | 340 | 5.1  | -0.074 | 47  | 5.6  | 0.041  | 323 | 16.0 | 0.041  |
| <i>Dactylis glomerata</i>        | 352 | 0.1  | 0.003  | 123 | 0.5  | 0.015  | 319 | 0.0  | 0.011  | 22  | 3.9  | 0.003  |
| <i>Dactylorhiza fuchsii</i>      | 112 | 6.2  | -0.020 | 308 | 11.8 | -0.066 | 110 | 1.4  | -0.066 | 162 | 7.2  | -0.036 |
| <i>Dactylorhiza incarnata</i>    | 60  | 14.5 | -0.006 | 348 | 2.3  | -0.012 | 238 | 24.9 | 0.032  | 327 | 10.1 | 0.026  |
| <i>Dactylorhiza maculata</i>     | 244 | 49.4 | -0.003 | 203 | 10.4 | -0.023 | 247 | 10.8 | 0.177  | 321 | 7.4  | 0.150  |
| <i>Dactylorhiza praetermissa</i> | 33  | 10.3 | -0.020 | 141 | 2.5  | 0.054  | 78  | 45.0 | 0.097  |     |      |        |
| <i>Dactylorhiza purpurella</i>   |     |      |        | 337 | 46.8 | 0.003  | 50  | 3.9  | 0.019  | 10  | 11.7 | 0.037  |
| <i>Danthonia decumbens</i>       | 243 | 29.9 | 0.001  | 135 | 5.5  | -0.096 | 280 | 3.8  | 0.130  | 300 | 3.2  | 0.072  |
| <i>Daphne laureola</i>           | 285 | 1.9  | 0.019  | 292 | 3.9  | 0.005  |     |      |        | 327 | 95.5 | 0.006  |
| <i>Daucus carota</i>             | 106 | 5.8  | -0.060 | 16  | 1.2  | 0.063  | 207 | 8.4  | 0.074  | 285 | 5.3  | 0.013  |
| <i>Deschampsia cespitosa</i>     | 239 | 2.9  | -0.027 | 330 | 3.8  | -0.079 | 26  | 1.8  | -0.039 | 118 | 1.1  | -0.002 |
| <i>Deschampsia flexuosa</i>      | 312 | 17.8 | -0.009 | 312 | 25.9 | -0.156 | 29  | 3.3  | -0.125 | 318 | 1.4  | -0.031 |

|                                   |     |      |        |     |      |        |     |      |        |     |      |        |
|-----------------------------------|-----|------|--------|-----|------|--------|-----|------|--------|-----|------|--------|
| <i>Deschampsia setacea</i>        |     |      |        |     |      |        |     |      |        | 219 | 12.6 | -0.003 |
| <i>Dianthus deltoides</i>         | 9   | 68.7 | -0.002 |     |      |        |     |      |        | 324 | 20.8 | 0.005  |
| <i>Digitalis purpurea</i>         | 77  | 14.7 | -0.053 | 303 | 11.9 | -0.075 | 109 | 1.4  | -0.010 | 205 | 4.1  | -0.017 |
| <i>Diphasiastrum alpinum</i>      |     |      |        |     |      |        |     |      |        | 357 | 27.5 | 0.022  |
| <i>Dipsacus pilosus</i>           | 260 | 2.5  | -0.013 |     |      |        |     |      |        | 278 | 8.4  | -0.009 |
| <i>Draba incana</i>               |     |      |        |     |      |        |     |      |        | 348 | 5.0  | 0.001  |
| <i>Draba muralis</i>              | 271 | 16.9 | 0.004  |     |      |        |     |      |        |     |      |        |
| <i>Drosera anglica</i>            |     |      |        |     |      |        |     |      |        | 335 | 34.7 | -0.021 |
| <i>Drosera intermedia</i>         | 148 | 28.5 | -0.001 |     |      |        |     |      |        | 237 | 7.3  | -0.017 |
| <i>Drosera rotundifolia</i>       | 321 | 16.9 | -0.012 | 139 | 48.8 | -0.055 | 316 | 9.4  | -0.023 | 217 | 3.4  | -0.010 |
| <i>Dryas octopetala</i>           |     |      |        |     |      |        |     |      |        | 256 | 16.7 | -0.011 |
| <i>Dryopteris aemula</i>          | 62  | 49.9 | 0.005  |     |      |        |     |      |        | 251 | 3.3  | -0.012 |
| <i>Dryopteris carthusiana</i>     | 80  | 11.5 | -0.022 | 330 | 7.0  | 0.055  | 23  | 17.6 | 0.024  | 72  | 12.2 | -0.025 |
| <i>Dryopteris dilatata</i>        | 63  | 4.9  | -0.067 | 313 | 19.1 | -0.085 | 344 | 1.9  | 0.062  | 143 | 2.1  | -0.021 |
| <i>Dryopteris expansa</i>         |     |      |        |     |      |        |     |      |        | 220 | 3.1  | -0.014 |
| <i>Dryopteris filix-mas</i>       | 58  | 2.1  | -0.019 | 313 | 6.7  | -0.046 | 60  | 1.1  | -0.024 | 124 | 5.5  | -0.072 |
| <i>Dryopteris oreades</i>         |     |      |        |     |      |        |     |      |        | 220 | 17.0 | 0.003  |
| <i>Echium vulgare</i>             | 75  | 23.1 | 0.009  | 30  | 5.2  | 0.044  | 212 | 12.3 | 0.005  | 338 | 4.9  | -0.001 |
| <i>Elatine hexandra</i>           |     |      |        |     |      |        |     |      |        | 28  | 19.0 | -0.002 |
| <i>Eleocharis acicularis</i>      | 91  | 18.5 | -0.003 |     |      |        |     |      |        | 253 | 24.2 | -0.003 |
| <i>Eleocharis multicaulis</i>     | 281 | 37.3 | 0.014  | 136 | 72.1 | -0.015 | 249 | 3.3  | 0.109  | 205 | 6.7  | 0.022  |
| <i>Eleocharis palustris</i>       | 273 | 2.6  | -0.017 | 332 | 6.6  | 0.011  | 225 | 2.4  | 0.139  | 206 | 0.8  | -0.024 |
| <i>Eleocharis quinqueflora</i>    | 38  | 7.9  | 0.007  | 144 | 10.9 | -0.014 | 231 | 22.7 | -0.011 | 163 | 5.0  | -0.028 |
| <i>Eleocharis uniglumis</i>       | 245 | 11.0 | 0.000  |     |      |        |     |      |        | 282 | 7.8  | 0.008  |
| <i>Eleogiton fluitans</i>         | 242 | 57.2 | 0.009  |     |      |        |     |      |        | 254 | 3.4  | 0.108  |
| <i>Elymus caninus</i>             | 18  | 11.3 | -0.018 | 305 | 2.6  | -0.042 | 158 | 1.8  | -0.133 | 122 | 4.4  | -0.024 |
| <i>Elytrigia atherica</i>         | 73  | 7.5  | 0.001  | 345 | 5.7  | 0.003  | 180 | 3.3  | 0.045  |     |      |        |
| <i>Elytrigia repens</i>           | 65  | 11.4 | -0.041 | 330 | 10.0 | 0.044  | 348 | 1.0  | -0.051 | 314 | 16.1 | 0.002  |
| <i>Empetrum nigrum</i>            |     |      |        | 282 | 21.8 | -0.022 | 339 | 15.7 | 0.057  | 10  | 6.6  | -0.021 |
| <i>Epilobium alsinifolium</i>     |     |      |        |     |      |        |     |      |        | 228 | 24.9 | -0.011 |
| <i>Epilobium anagallidifolium</i> |     |      |        |     |      |        |     |      |        | 70  | 1.6  | 0.000  |
| <i>Epilobium hirsutum</i>         | 53  | 6.1  | -0.049 | 324 | 7.5  | 0.089  | 200 | 7.7  | 0.172  | 55  | 6.0  | -0.020 |
| <i>Epilobium lanceolatum</i>      | 238 | 9.2  | 0.020  |     |      |        |     |      |        |     |      |        |
| <i>Epilobium montanum</i>         | 193 | 2.1  | -0.020 | 325 | 1.2  | -0.071 | 46  | 2.2  | -0.028 | 344 | 6.2  | -0.012 |
| <i>Epilobium obscurum</i>         | 238 | 19.8 | -0.098 | 132 | 1.2  | 0.145  | 324 | 2.6  | 0.039  | 162 | 2.8  | 0.027  |
| <i>Epilobium palustre</i>         | 277 | 29.7 | -0.006 | 103 | 2.8  | -0.193 | 53  | 3.0  | -0.103 | 344 | 2.0  | 0.012  |
| <i>Epilobium parviflorum</i>      | 97  | 4.6  | -0.253 | 151 | 6.5  | 0.208  | 291 | 1.8  | 0.060  | 115 | 3.4  | -0.033 |
| <i>Epilobium roseum</i>           | 258 | 11.3 | -0.020 | 238 | 8.4  | 0.019  |     |      |        | 122 | 17.0 | 0.000  |
| <i>Epilobium tetragonum</i>       | 83  | 1.7  | -0.195 | 133 | 2.6  | 0.108  | 164 | 3.3  | -0.072 |     |      |        |
| <i>Epipactis helleborine</i>      | 164 | 2.8  | -0.010 | 325 | 5.1  | 0.005  | 213 | 22.6 | -0.020 | 11  | 51.9 | -0.001 |
| <i>Epipactis palustris</i>        | 53  | 45.4 | 0.008  |     |      |        |     |      |        |     |      |        |
| <i>Epipactis phyllanthes</i>      | 88  | 2.0  | -0.001 |     |      |        |     |      |        |     |      |        |
| <i>Epipactis purpurata</i>        | 80  | 13.7 | -0.020 |     |      |        |     |      |        |     |      |        |
| <i>Equisetum arvense</i>          | 63  | 7.2  | -0.016 | 307 | 2.7  | 0.028  | 334 | 1.2  | -0.085 | 2   | 3.7  | -0.016 |
| <i>Equisetum fluviatile</i>       | 47  | 7.4  | -0.022 | 333 | 3.0  | -0.034 | 12  | 0.8  | 0.016  | 15  | 1.4  | -0.026 |
| <i>Equisetum hyemale</i>          |     |      |        | 349 | 22.9 | 0.009  |     |      |        | 353 | 3.8  | -0.005 |
| <i>Equisetum palustre</i>         | 56  | 11.4 | -0.036 | 313 | 3.0  | -0.143 | 215 | 2.4  | -0.009 | 11  | 6.9  | -0.014 |
| <i>Equisetum pratense</i>         |     |      |        |     |      |        |     |      |        | 67  | 1.5  | 0.002  |
| <i>Equisetum sylvaticum</i>       | 292 | 40.6 | -0.009 | 317 | 34.8 | -0.112 | 173 | 11.0 | 0.010  | 181 | 7.4  | -0.014 |
| <i>Equisetum telmateia</i>        | 73  | 8.5  | -0.008 | 351 | 6.2  | -0.034 | 207 | 25.2 | 0.002  | 65  | 15.7 | -0.005 |

|                                 |     |      |        |     |      |        |     |      |        |     |       |       |
|---------------------------------|-----|------|--------|-----|------|--------|-----|------|--------|-----|-------|-------|
| <i>Equisetum variegatum</i>     |     |      |        |     |      |        |     |      | 55     | 4.0 | 0.002 |       |
| <i>Erica ciliaris</i>           | 178 | 53.0 | -0.002 |     |      |        |     |      |        |     |       |       |
| <i>Erica cinerea</i>            | 236 | 24.4 | -0.027 | 307 | 10.6 | -0.036 | 340 | 12.4 | 0.117  | 312 | 3.2   | 0.016 |
| <i>Erica tetralix</i>           | 341 | 8.1  | -0.023 | 225 | 8.9  | -0.041 | 2   | 12.1 | 0.027  | 193 | 5.5   | 0.011 |
| <i>Erigeron acris</i>           | 78  | 14.3 | 0.020  | 115 | 6.3  | 0.039  | 150 | 13.2 | 0.062  |     |       |       |
| <i>Eriophorum angustifolium</i> | 244 | 41.1 | -0.006 | 138 | 30.0 | -0.102 | 241 | 3.1  | 0.037  | 186 | 3.6   | 0.018 |
| <i>Eriophorum latifolium</i>    |     |      |        | 234 | 7.9  | -0.012 |     |      |        | 139 | 9.0   | 0.004 |
| <i>Eriophorum vaginatum</i>     | 204 | 43.0 | -0.002 | 146 | 43.8 | -0.056 | 319 | 7.8  | 0.031  | 280 | 3.4   | 0.008 |
| <i>Erophila glabrescens</i>     | 195 | 14.9 | 0.022  |     |      |        |     |      |        | 158 | 1.5   | 0.030 |
| <i>Euonymus europaeus</i>       | 90  | 6.6  | 0.061  | 308 | 21.5 | 0.044  | 258 | 18.4 | -0.030 |     |       |       |
| <i>Eupatorium cannabinum</i>    | 78  | 8.2  | 0.009  | 229 | 6.4  | 0.004  | 194 | 5.2  | 0.000  | 246 | 13.4  | 0.014 |
| <i>Euphorbia amygdaloides</i>   | 206 | 4.8  | 0.010  |     |      |        | 135 | 27.1 | 0.009  |     |       |       |
| <i>Euphorbia stricta</i>        | 270 | 23.4 | 0.005  |     |      |        |     |      |        |     |       |       |
| <i>Euphrasia arctica</i>        |     |      |        |     |      |        |     |      |        | 80  | 4.0   | 0.013 |
| <i>Fagus sylvatica</i>          | 85  | 4.6  | 0.028  | 84  | 2.3  | 0.047  | 139 | 2.8  | -0.117 | 132 | 10.7  | 0.015 |
| <i>Festuca altissima</i>        |     |      |        |     |      |        |     |      |        | 117 | 30.6  | 0.017 |
| <i>Ficaria verna</i>            | 161 | 2.3  | 0.043  | 310 | 8.3  | -0.058 | 231 | 1.9  | -0.017 | 4   | 10.6  | 0.051 |
| <i>Filago minima</i>            | 6   | 1.3  | 0.014  | 110 | 5.3  | 0.019  |     |      |        | 203 | 24.6  | 0.028 |
| <i>Filago vulgaris</i>          | 267 | 20.0 | 0.089  | 326 | 23.3 | 0.043  |     |      |        |     |       |       |
| <i>Filipendula ulmaria</i>      | 103 | 0.3  | -0.006 | 311 | 3.4  | -0.025 | 184 | 1.5  | -0.066 | 174 | 1.0   | 0.003 |
| <i>Filipendula vulgaris</i>     | 260 | 3.3  | -0.011 | 294 | 23.9 | -0.002 |     |      |        |     |       |       |
| <i>Fragaria vesca</i>           | 211 | 6.5  | 0.001  | 303 | 3.8  | -0.085 | 34  | 1.4  | -0.159 | 179 | 7.2   | 0.053 |
| <i>Frangula alnus</i>           | 201 | 12.2 | 0.014  |     |      |        |     |      |        |     |       |       |
| <i>Fraxinus excelsior</i>       | 224 | 1.8  | 0.048  | 332 | 2.6  | 0.057  | 200 | 0.7  | -0.073 | 182 | 1.9   | 0.002 |
| <i>Fritillaria meleagris</i>    | 166 | 11.6 | 0.002  |     |      |        |     |      |        |     |       |       |
| <i>Fumaria bastardii</i>        | 245 | 8.9  | -0.004 |     |      |        | 150 | 36.5 | 0.037  | 153 | 3.1   | 0.007 |
| <i>Fumaria capreolata</i>       | 36  | 14.2 | 0.008  | 5   | 29.5 | -0.006 | 147 | 1.3  | 0.054  | 19  | 50.4  | 0.003 |
| <i>Fumaria muralis</i>          | 236 | 56.0 | 0.030  | 252 | 5.4  | 0.052  | 289 | 4.4  | 0.082  | 108 | 7.3   | 0.008 |
| <i>Fumaria occidentalis</i>     | 252 | 15.5 | -0.007 |     |      |        |     |      |        |     |       |       |
| <i>Fumaria purpurea</i>         |     |      |        |     |      |        |     |      |        | 39  | 14.1  | 0.012 |
| <i>Gagea lutea</i>              |     |      |        | 1   | 50.8 | 0.000  |     |      |        |     |       |       |
| <i>Galium album</i>             | 212 | 7.9  | -0.006 | 337 | 22.5 | 0.053  | 126 | 1.1  | -0.005 | 76  | 4.0   | 0.019 |
| <i>Galium aparine</i>           | 49  | 0.6  | 0.002  | 355 | 2.4  | 0.024  | 16  | 1.5  | 0.022  | 355 | 7.1   | 0.064 |
| <i>Galium boreale</i>           |     |      |        |     |      |        |     |      |        | 20  | 8.0   | 0.026 |
| <i>Galium odoratum</i>          | 240 | 16.5 | -0.031 | 287 | 16.1 | -0.036 | 178 | 14.8 | -0.041 | 112 | 0.8   | 0.026 |
| <i>Galium palustre</i>          | 131 | 1.5  | 0.006  | 288 | 9.9  | -0.134 | 285 | 1.3  | 0.015  | 192 | 3.9   | 0.012 |
| <i>Galium parisiense</i>        | 233 | 12.6 | 0.003  |     |      |        |     |      |        |     |       |       |
| <i>Galium saxatile</i>          | 296 | 2.3  | -0.021 | 321 | 33.4 | -0.165 | 22  | 5.7  | -0.018 | 319 | 2.4   | 0.022 |
| <i>Galium uliginosum</i>        | 57  | 3.4  | 0.005  | 328 | 7.4  | -0.014 | 267 | 0.9  | 0.000  | 139 | 7.7   | 0.008 |
| <i>Galium verum</i>             | 41  | 4.1  | 0.028  | 271 | 6.4  | 0.083  | 16  | 12.4 | 0.103  | 23  | 5.8   | 0.042 |
| <i>Gaudinia fragilis</i>        | 205 | 66.8 | 0.007  |     |      |        |     |      |        |     |       |       |
| <i>Genista anglica</i>          | 234 | 36.8 | -0.009 |     |      |        | 360 | 3.7  | 0.022  | 299 | 3.7   | 0.012 |
| <i>Genista tinctoria</i>        | 147 | 15.7 | -0.052 | 323 | 19.0 | 0.005  |     |      |        |     |       |       |
| <i>Gentiana pneumonanthe</i>    | 249 | 10.8 | -0.004 |     |      |        |     |      |        |     |       |       |
| <i>Gentianella amarella</i>     | 214 | 10.1 | -0.029 | 300 | 10.4 | -0.012 |     |      |        | 34  | 8.6   | 0.003 |
| <i>Gentianella anglica</i>      | 334 | 11.4 | -0.010 |     |      |        |     |      |        |     |       |       |
| <i>Gentianella campestris</i>   |     |      |        |     |      |        |     |      |        | 309 | 2.6   | 0.030 |
| <i>Gentianella germanica</i>    | 57  | 2.0  | -0.014 |     |      |        |     |      |        |     |       |       |
| <i>Geranium columbinum</i>      | 237 | 37.6 | -0.005 |     |      |        | 168 | 1.5  | 0.019  |     |       |       |
| <i>Geranium lucidum</i>         | 246 | 18.9 | 0.092  | 177 | 0.3  | 0.100  | 175 | 18.4 | 0.014  | 110 | 8.8   | 0.005 |



|                                 |     |       |        |     |      |        |     |      |        |     |      |        |
|---------------------------------|-----|-------|--------|-----|------|--------|-----|------|--------|-----|------|--------|
| <i>Hypericum perforatum</i>     | 71  | 1.8   | 0.063  | 302 | 2.1  | 0.040  | 276 | 4.4  | -0.035 | 117 | 22.7 | -0.033 |
| <i>Hypericum pulchrum</i>       | 231 | 49.1  | -0.038 | 313 | 8.8  | -0.047 | 15  | 3.9  | 0.015  | 316 | 5.5  | 0.037  |
| <i>Hypericum tetrapterum</i>    | 108 | 1.9   | 0.041  | 214 | 2.3  | -0.027 | 238 | 1.0  | -0.042 | 208 | 7.3  | -0.030 |
| <i>Hypericum undulatum</i>      | 63  | 205.9 | 0.001  |     |      |        |     |      |        |     |      |        |
| <i>Hypochaeris glabra</i>       | 62  | 59.3  | 0.016  |     |      |        |     |      |        |     |      |        |
| <i>Hypochaeris radicata</i>     | 227 | 3.2   | 0.002  | 280 | 1.9  | -0.093 | 50  | 2.1  | 0.066  | 352 | 4.1  | 0.026  |
| <i>Hypopitys monotropa</i>      | 36  | 1.3   | 0.004  |     |      |        |     |      |        |     |      |        |
| <i>Ilex aquifolium</i>          | 76  | 6.4   | 0.044  | 53  | 1.7  | 0.113  | 86  | 3.8  | -0.064 | 157 | 5.9  | -0.012 |
| <i>Illecebrum verticillatum</i> | 164 | 34.3  | 0.001  |     |      |        |     |      |        |     |      |        |
| <i>Inula conyzae</i>            | 213 | 19.3  | -0.001 | 317 | 21.8 | 0.016  | 160 | 8.2  | 0.054  |     |      |        |
| <i>Iris foetidissima</i>        | 154 | 10.3  | 0.182  | 198 | 23.3 | 0.041  | 358 | 2.8  | 0.051  |     |      |        |
| <i>Iris pseudacorus</i>         | 54  | 4.5   | -0.076 | 182 | 1.6  | 0.196  | 219 | 5.0  | 0.081  | 270 | 2.8  | 0.001  |
| <i>Isoetes echinospora</i>      |     |       |        |     |      |        |     |      |        | 177 | 1.1  | -0.008 |
| <i>Isoetes lacustris</i>        |     |       |        |     |      |        |     |      |        | 233 | 8.2  | -0.003 |
| <i>Isolepis cernua</i>          | 228 | 3.7   | 0.008  |     |      |        | 298 | 1.2  | 0.085  | 259 | 18.2 | 0.018  |
| <i>Isolepis setacea</i>         | 255 | 11.2  | 0.007  | 294 | 1.7  | -0.027 | 312 | 2.7  | 0.070  | 223 | 1.2  | 0.047  |
| <i>Jasione montana</i>          | 237 | 123.1 | -0.054 | 3   | 4.1  | -0.018 | 95  | 3.5  | -0.056 | 194 | 5.3  | -0.011 |
| <i>Juncus acutiflorus</i>       | 245 | 12.8  | -0.034 | 324 | 6.6  | -0.018 | 282 | 3.8  | 0.025  | 191 | 9.7  | -0.078 |
| <i>Juncus alpinoarticulatus</i> |     |       |        |     |      |        |     |      |        | 117 | 4.0  | 0.003  |
| <i>Juncus articulatus</i>       | 141 | 2.0   | -0.034 | 318 | 1.8  | -0.165 | 167 | 0.2  | 0.037  | 338 | 1.0  | 0.046  |
| <i>Juncus bulbosus</i>          | 228 | 27.5  | -0.015 | 147 | 27.4 | -0.131 | 203 | 0.7  | 0.004  | 319 | 5.8  | 0.030  |
| <i>Juncus compressus</i>        | 46  | 27.5  | 0.000  |     |      |        |     |      |        |     |      |        |
| <i>Juncus conglomeratus</i>     | 181 | 6.9   | -0.026 | 309 | 6.2  | -0.050 | 326 | 3.4  | 0.105  | 7   | 3.7  | 0.027  |
| <i>Juncus effusus</i>           | 144 | 0.3   | 0.004  | 300 | 6.5  | -0.078 | 11  | 3.4  | 0.000  | 222 | 0.8  | 0.015  |
| <i>Juncus inflexus</i>          | 63  | 12.7  | 0.085  | 317 | 5.1  | 0.117  | 228 | 9.4  | 0.012  | 143 | 38.4 | -0.047 |
| <i>Juncus squarrosus</i>        | 264 | 29.4  | 0.006  | 330 | 12.0 | -0.047 | 337 | 9.5  | -0.018 | 259 | 1.3  | 0.015  |
| <i>Juncus subnodulosus</i>      | 39  | 23.7  | -0.023 | 184 | 2.2  | 0.011  | 67  | 27.6 | -0.003 |     |      |        |
| <i>Juncus trifidus</i>          |     |       |        |     |      |        |     |      |        | 162 | 17.3 | -0.027 |
| <i>Juncus triglumis</i>         |     |       |        |     |      |        |     |      |        | 161 | 21.8 | -0.019 |
| <i>Juniperus communis</i>       | 176 | 27.6  | -0.005 | 145 | 58.8 | 0.005  |     |      |        | 79  | 1.5  | 0.046  |
| <i>Kalmia procumbens</i>        |     |       |        |     |      |        |     |      |        | 66  | 1.8  | -0.004 |
| <i>Knautia arvensis</i>         | 78  | 4.9   | -0.093 | 290 | 6.4  | 0.015  | 277 | 4.9  | -0.024 | 279 | 23.7 | -0.003 |
| <i>Koeleria macrantha</i>       | 265 | 6.2   | -0.024 | 323 | 2.1  | -0.010 | 241 | 15.9 | -0.007 | 5   | 19.9 | 0.019  |
| <i>Lactuca virosa</i>           | 266 | 44.9  | 0.078  | 324 | 90.1 | 0.064  |     |      |        |     |      |        |
| <i>Lamiastrum galeobdolon</i>   | 108 | 7.0   | 0.093  | 338 | 9.5  | 0.107  | 294 | 16.0 | -0.040 | 35  | 6.8  | 0.036  |
| <i>Lapsana communis</i>         | 59  | 2.3   | 0.045  | 324 | 3.9  | 0.072  | 30  | 7.0  | -0.122 | 169 | 1.2  | -0.015 |
| <i>Lathraea squamaria</i>       | 228 | 1.7   | -0.004 | 284 | 8.1  | -0.006 |     |      |        |     |      |        |
| <i>Lathyrus aphaca</i>          | 145 | 14.6  | 0.003  |     |      |        |     |      |        |     |      |        |
| <i>Lathyrus linifolius</i>      | 237 | 39.0  | -0.003 | 321 | 16.4 | -0.130 | 169 | 1.8  | -0.101 | 3   | 10.5 | -0.039 |
| <i>Lathyrus nissolia</i>        | 218 | 10.7  | 0.017  |     |      |        |     |      |        |     |      |        |
| <i>Lathyrus pratensis</i>       | 80  | 1.3   | -0.031 | 329 | 1.1  | -0.003 | 6   | 0.7  | -0.004 | 32  | 3.2  | 0.008  |
| <i>Lathyrus sylvestris</i>      | 230 | 4.3   | -0.002 |     |      |        |     |      |        |     |      |        |
| <i>Lemna gibba</i>              | 269 | 15.6  | 0.000  | 127 | 82.2 | 0.007  |     |      |        |     |      |        |
| <i>Lemna minor</i>              | 41  | 5.2   | -0.003 | 165 | 3.5  | 0.167  | 170 | 6.4  | 0.119  | 118 | 9.5  | -0.004 |
| <i>Lemna trisulca</i>           | 53  | 20.5  | 0.035  | 153 | 3.5  | 0.063  | 232 | 24.8 | 0.017  | 4   | 28.4 | -0.001 |
| <i>Leontodon hispidus</i>       | 105 | 2.4   | -0.028 | 330 | 7.6  | -0.045 | 176 | 6.3  | -0.201 | 152 | 53.8 | -0.017 |
| <i>Leontodon saxatilis</i>      | 180 | 11.5  | 0.055  | 271 | 0.7  | -0.003 | 211 | 5.8  | 0.034  | 184 | 7.2  | -0.008 |
| <i>Lepidium heterophyllum</i>   | 229 | 31.9  | -0.017 |     |      |        | 339 | 12.3 | 0.009  | 106 | 5.8  | -0.015 |
| <i>Lepidium latifolium</i>      | 251 | 135.9 | 0.003  |     |      |        |     |      |        |     |      |        |
| <i>Leucanthemum vulgare</i>     | 77  | 1.2   | -0.022 | 315 | 1.9  | -0.001 | 228 | 1.7  | 0.011  | 360 | 10.4 | -0.003 |





|                                 |     |       |        |     |      |        |     |      |        |     |      |        |
|---------------------------------|-----|-------|--------|-----|------|--------|-----|------|--------|-----|------|--------|
| <i>Orchis mascula</i>           | 216 | 16.9  | -0.028 | 295 | 20.3 | -0.039 | 227 | 11.2 | -0.053 | 288 | 7.6  | -0.006 |
| <i>Oreopteris limbosperma</i>   | 260 | 73.4  | -0.001 | 239 | 3.7  | -0.030 | 5   | 14.5 | -0.033 | 267 | 3.6  | 0.023  |
| <i>Origanum vulgare</i>         | 172 | 10.9  | -0.032 | 295 | 14.7 | 0.022  | 228 | 4.3  | 0.036  | 300 | 14.0 | -0.009 |
| <i>Ornithogalum pyrenaicum</i>  | 219 | 30.5  | 0.002  |     |      |        |     |      |        |     |      |        |
| <i>Ornithopus perpusillus</i>   | 323 | 2.5   | -0.018 | 121 | 3.2  | 0.036  | 171 | 13.5 | 0.122  | 68  | 1.5  | -0.002 |
| <i>Orobanche alba</i>           |     |       |        |     |      |        |     |      |        | 293 | 6.5  | 0.006  |
| <i>Orobanche elatior</i>        | 119 | 14.7  | -0.021 |     |      |        |     |      |        |     |      |        |
| <i>Orobanche hederarum</i>      | 88  | 20.5  | 0.016  |     |      |        | 82  | 1.9  | 0.047  |     |      |        |
| <i>Orobanche minor</i>          | 71  | 5.9   | 0.002  |     |      |        |     |      |        |     |      |        |
| <i>Orobanche rapum-genistae</i> | 253 | 31.0  | -0.002 |     |      |        |     |      |        |     |      |        |
| <i>Orthilia secunda</i>         |     |       |        |     |      |        |     |      |        | 9   | 42.7 | -0.063 |
| <i>Osmunda regalis</i>          | 236 | 22.7  | 0.000  | 16  | 0.7  | 0.000  | 181 | 2.0  | 0.037  | 260 | 4.2  | -0.013 |
| <i>Oxalis acetosella</i>        | 256 | 11.6  | -0.032 | 320 | 38.4 | -0.179 | 55  | 4.3  | -0.052 | 186 | 2.3  | -0.003 |
| <i>Oxyria digyna</i>            |     |       |        |     |      |        |     |      |        | 288 | 19.8 | 0.014  |
| <i>Parentucellia viscosa</i>    | 191 | 0.3   | -0.015 |     |      |        |     |      |        |     |      |        |
| <i>Parietaria judaica</i>       | 206 | 2.3   | -0.052 | 249 | 1.3  | 0.053  | 122 | 0.5  | 0.038  |     |      |        |
| <i>Paris quadrifolia</i>        | 33  | 1.3   | -0.016 | 355 | 1.6  | -0.001 |     |      |        |     |      |        |
| <i>Parnassia palustris</i>      |     |       |        | 153 | 6.3  | -0.043 |     |      |        | 243 | 2.3  | 0.018  |
| <i>Pastinaca sativa</i>         | 273 | 12.7  | -0.058 | 292 | 8.7  | -0.001 | 283 | 18.4 | -0.012 |     |      |        |
| <i>Pedicularis palustris</i>    | 51  | 25.5  | -0.010 | 329 | 50.0 | -0.031 | 267 | 24.6 | -0.044 | 327 | 9.3  | 0.045  |
| <i>Pedicularis sylvatica</i>    | 235 | 68.7  | -0.041 | 155 | 7.3  | -0.089 | 294 | 5.3  | -0.012 | 186 | 2.7  | -0.003 |
| <i>Persicaria amphibia</i>      | 220 | 5.9   | 0.013  | 163 | 8.3  | 0.205  | 344 | 22.6 | 0.050  | 53  | 8.4  | -0.018 |
| <i>Persicaria bistorta</i>      | 42  | 4.0   | -0.029 | 326 | 3.8  | -0.058 | 80  | 1.3  | -0.060 | 29  | 8.2  | -0.022 |
| <i>Persicaria hydropiper</i>    | 214 | 14.9  | 0.009  | 217 | 13.9 | 0.013  | 345 | 3.2  | 0.003  | 194 | 19.4 | -0.022 |
| <i>Persicaria lapathifolia</i>  | 61  | 4.8   | -0.017 | 161 | 5.1  | -0.014 | 34  | 1.9  | -0.040 | 135 | 5.5  | -0.026 |
| <i>Persicaria maculosa</i>      | 63  | 5.8   | -0.038 | 333 | 6.5  | -0.094 | 25  | 0.9  | -0.047 | 289 | 2.5  | -0.043 |
| <i>Persicaria minor</i>         | 227 | 17.0  | 0.004  |     |      |        |     |      |        |     |      |        |
| <i>Persicaria mitis</i>         | 24  | 3.8   | -0.002 |     |      |        |     |      |        |     |      |        |
| <i>Persicaria vivipara</i>      |     |       |        |     |      |        |     |      |        | 198 | 13.1 | -0.063 |
| <i>Petasites hybridus</i>       | 326 | 4.2   | -0.061 | 323 | 12.0 | 0.039  | 239 | 3.0  | -0.110 | 358 | 2.9  | -0.015 |
| <i>Petroselinum segetum</i>     | 273 | 21.2  | 0.005  |     |      |        |     |      |        |     |      |        |
| <i>Phalaris arundinacea</i>     | 326 | 3.1   | -0.003 | 181 | 2.3  | 0.053  | 6   | 1.5  | -0.118 | 311 | 2.1  | 0.001  |
| <i>Phegopteris connectilis</i>  |     |       |        | 338 | 4.1  | -0.035 | 53  | 2.5  | -0.029 | 262 | 7.3  | -0.032 |
| <i>Phragmites australis</i>     | 263 | 6.1   | -0.052 | 142 | 11.7 | 0.192  | 342 | 1.9  | 0.138  | 250 | 1.6  | -0.001 |
| <i>Phyteuma orbiculare</i>      | 2   | 4.8   | 0.001  |     |      |        |     |      |        |     |      |        |
| <i>Picris hieracioides</i>      | 114 | 24.0  | -0.015 |     |      |        |     |      |        |     |      |        |
| <i>Pilosella officinarum</i>    | 287 | 2.2   | -0.003 | 344 | 12.6 | 0.161  | 233 | 0.4  | -0.030 | 175 | 1.0  | 0.010  |
| <i>Pilularia globulifera</i>    | 217 | 79.9  | 0.000  |     |      |        |     |      |        |     |      |        |
| <i>Pimpinella major</i>         | 355 | 6.5   | 0.006  | 153 | 16.9 | 0.009  |     |      |        |     |      |        |
| <i>Pimpinella saxifraga</i>     | 121 | 4.8   | -0.087 | 313 | 7.7  | -0.019 | 1   | 4.6  | -0.088 | 208 | 4.2  | -0.045 |
| <i>Pinguicula lusitanica</i>    | 232 | 141.9 | -0.003 |     |      |        |     |      |        | 290 | 14.8 | 0.030  |
| <i>Pinguicula vulgaris</i>      |     |       |        | 160 | 15.6 | -0.069 | 330 | 7.2  | -0.044 | 177 | 8.0  | -0.051 |
| <i>Pinus sylvestris</i>         | 243 | 3.3   | -0.055 | 293 | 1.6  | 0.017  | 37  | 2.9  | -0.069 | 89  | 5.5  | -0.049 |
| <i>Plantago coronopus</i>       | 30  | 17.7  | 0.091  | 84  | 12.5 | 0.063  | 260 | 9.9  | 0.115  |     |      |        |
| <i>Plantago lanceolata</i>      | 29  | 0.4   | 0.005  | 118 | 1.4  | 0.016  | 13  | 0.3  | -0.013 | 3   | 0.9  | -0.020 |
| <i>Plantago major</i>           | 75  | 0.6   | 0.017  | 335 | 0.1  | 0.021  | 18  | 0.5  | -0.036 | 19  | 2.2  | 0.059  |
| <i>Plantago maritima</i>        | 77  | 16.0  | 0.001  | 5   | 18.0 | 0.020  | 10  | 14.6 | 0.058  | 113 | 10.7 | 0.047  |
| <i>Plantago media</i>           | 72  | 11.0  | -0.062 | 179 | 3.5  | -0.029 |     |      |        |     |      |        |
| <i>Platanthera bifolia</i>      | 232 | 33.1  | 0.000  |     |      |        |     |      |        | 316 | 8.5  | -0.003 |
| <i>Platanthera chlorantha</i>   | 231 | 16.1  | -0.008 | 314 | 11.8 | -0.002 |     |      |        | 309 | 12.2 | 0.003  |

|                            |     |      |        |     |      |        |     |      |        |      |       |        |
|----------------------------|-----|------|--------|-----|------|--------|-----|------|--------|------|-------|--------|
| Poa alpina                 |     |      |        |     |      |        |     |      | 303    | 16.7 | 0.009 |        |
| Poa annua                  | 44  | 0.0  | 0.023  | 162 | 3.5  | -0.002 | 47  | 1.1  | -0.016 | 6    | 0.9   | 0.054  |
| Poa compressa              | 223 | 1.8  | 0.014  | 291 | 3.0  | 0.012  |     |      |        |      |       |        |
| Poa glauca                 |     |      |        |     |      |        |     |      |        | 295  | 12.6  | 0.000  |
| Poa infirma                | 177 | 39.1 | 0.018  |     |      |        |     |      |        |      |       |        |
| Poa nemoralis              | 244 | 11.3 | -0.059 | 318 | 6.0  | -0.003 | 112 | 1.9  | -0.153 | 125  | 4.6   | 0.008  |
| Poa trivialis              | 64  | 1.4  | 0.032  | 167 | 1.1  | -0.002 | 241 | 1.5  | -0.136 | 112  | 6.0   | 0.102  |
| Polemonium caeruleum       | 248 | 6.1  | -0.001 | 308 | 2.8  | 0.013  |     |      |        | 42   | 6.9   | 0.002  |
| Polygala calcarea          | 4   | 20.4 | -0.013 |     |      |        |     |      |        |      |       |        |
| Polygala serpyllifolia     | 229 | 26.4 | -0.027 | 130 | 6.7  | -0.084 | 341 | 8.0  | -0.065 | 192  | 4.3   | 0.002  |
| Polygala vulgaris          | 219 | 13.6 | -0.051 | 233 | 3.7  | -0.077 | 300 | 8.7  | -0.030 | 333  | 12.6  | 0.001  |
| Polygonatum multiflorum    | 205 | 33.7 | -0.003 |     |      |        |     |      |        |      |       |        |
| Polygonum boreale          |     |      |        |     |      |        |     |      |        | 19   | 16.1  | 0.010  |
| Polypogon monspeliensis    | 95  | 15.6 | 0.022  |     |      |        |     |      |        |      |       |        |
| Polystichum aculeatum      | 256 | 4.2  | 0.003  | 322 | 20.2 | 0.007  | 231 | 9.7  | -0.081 | 130  | 1.4   | 0.029  |
| Polystichum lonchitis      |     |      |        |     |      |        |     |      |        | 130  | 20.0  | -0.001 |
| Polystichum setiferum      | 235 | 46.1 | 0.070  | 259 | 12.4 | 0.048  | 226 | 8.2  | 0.008  | 174  | 3.5   | 0.001  |
| Populus nigra              | 224 | 21.4 | 0.020  | 170 | 26.7 | 0.121  | 164 | 2.0  | -0.012 | 133  | 2.2   | 0.018  |
| Populus tremula            | 103 | 2.7  | 0.022  | 180 | 1.8  | 0.037  | 200 | 5.0  | -0.051 | 154  | 3.7   | 0.022  |
| Potamogeton alpinus        |     |      |        |     |      |        |     |      |        | 228  | 8.0   | 0.009  |
| Potamogeton bertholdii     | 338 | 1.3  | 0.012  | 357 | 1.1  | 0.013  | 296 | 5.5  | 0.060  | 157  | 26.7  | 0.016  |
| Potamogeton coloratus      | 250 | 65.5 | -0.003 |     |      |        |     |      |        |      |       |        |
| Potamogeton crispus        | 217 | 1.3  | -0.017 | 202 | 0.3  | 0.031  | 271 | 4.7  | -0.040 | 318  | 8.0   | 0.030  |
| Potamogeton filiformis     |     |      |        |     |      |        |     |      |        | 43   | 14.2  | 0.009  |
| Potamogeton friesii        | 51  | 14.1 | 0.004  |     |      |        |     |      |        |      |       |        |
| Potamogeton gramineus      |     |      |        |     |      |        |     |      |        | 163  | 10.3  | 0.025  |
| Potamogeton lucens         | 59  | 7.6  | 0.000  | 48  | 1.0  | 0.009  |     |      |        |      |       |        |
| Potamogeton natans         | 79  | 2.6  | 0.016  | 309 | 1.2  | 0.046  | 194 | 26.7 | 0.043  | 138  | 4.0   | 0.068  |
| Potamogeton obtusifolius   | 39  | 12.4 | 0.003  | 220 | 2.8  | 0.006  |     |      |        | 158  | 25.9  | 0.002  |
| Potamogeton pectinatus     | 240 | 45.4 | -0.033 | 159 | 10.0 | 0.073  | 242 | 38.9 | 0.022  | 136  | 5.9   | 0.023  |
| Potamogeton perfoliatus    | 218 | 6.3  | -0.017 | 94  | 3.4  | 0.015  |     |      |        | 171  | 21.0  | 0.026  |
| Potamogeton polygonifolius | 237 | 16.9 | -0.002 | 142 | 8.8  | -0.053 | 352 | 6.0  | 0.009  | 232  | 3.1   | 0.039  |
| Potamogeton praelongus     |     |      |        |     |      |        |     |      |        | 40   | 2.5   | 0.000  |
| Potamogeton pusillus       | 51  | 5.5  | 0.018  | 147 | 66.9 | 0.028  |     |      |        | 115  | 4.1   | 0.013  |
| Potamogeton trichoides     | 55  | 2.4  | 0.009  |     |      |        |     |      |        |      |       |        |
| Potentilla anglica         | 248 | 1.9  | -0.035 | 321 | 6.0  | 0.002  | 158 | 4.4  | -0.036 | 150  | 1.4   | 0.019  |
| Potentilla anserina        | 66  | 3.3  | -0.027 | 306 | 2.3  | 0.064  | 21  | 1.3  | 0.049  | 2    | 2.6   | 0.006  |
| Potentilla argentea        | 246 | 48.3 | 0.004  |     |      |        |     |      |        |      |       |        |
| Potentilla crantzii        |     |      |        |     |      |        |     |      |        | 128  | 3.6   | 0.005  |
| Potentilla erecta          | 263 | 13.5 | -0.037 | 322 | 26.6 | -0.352 | 14  | 7.6  | -0.004 | 324  | 4.3   | 0.026  |
| Potentilla reptans         | 84  | 3.7  | -0.017 | 7   | 5.3  | 0.062  | 183 | 2.6  | -0.112 | 148  | 39.1  | 0.032  |
| Potentilla sterilis        | 217 | 4.0  | -0.003 | 317 | 8.6  | -0.072 | 358 | 3.0  | -0.050 | 352  | 13.0  | 0.022  |
| Poterium sanguisorba       | 210 | 8.0  | -0.018 | 265 | 17.9 | 0.036  | 210 | 20.5 | -0.056 |      |       |        |
| Primula farinosa           |     |      |        | 345 | 2.5  | -0.012 |     |      |        |      |       |        |
| Primula scotica            |     |      |        |     |      |        |     |      |        | 3    | 9.1   | 0.003  |
| Primula veris              | 73  | 9.7  | -0.023 | 296 | 23.7 | 0.067  | 229 | 20.9 | -0.014 | 102  | 5.2   | 0.011  |
| Primula vulgaris           | 111 | 4.6  | 0.045  | 333 | 15.7 | -0.060 | 284 | 3.2  | -0.149 | 305  | 1.2   | 0.008  |
| Prunella vulgaris          | 33  | 0.9  | 0.018  | 289 | 0.8  | 0.015  | 313 | 0.8  | 0.013  | 313  | 1.0   | 0.006  |
| Prunus avium               | 65  | 5.4  | 0.138  | 145 | 5.0  | 0.189  | 237 | 9.7  | -0.025 | 120  | 12.1  | 0.007  |
| Prunus padus               | 52  | 29.4 | 0.037  | 241 | 3.4  | -0.018 | 260 | 25.2 | -0.037 | 113  | 10.8  | 0.009  |

|                                |     |       |        |     |      |        |     |      |        |     |      |        |
|--------------------------------|-----|-------|--------|-----|------|--------|-----|------|--------|-----|------|--------|
| <i>Prunus spinosa</i>          | 213 | 0.9   | 0.006  | 158 | 1.7  | 0.068  | 16  | 1.8  | -0.047 | 156 | 9.5  | -0.012 |
| <i>Pseudorchis albida</i>      |     |       |        |     |      |        |     |      |        | 308 | 2.8  | -0.015 |
| <i>Pteridium aquilinum</i>     | 62  | 3.8   | 0.026  | 314 | 18.4 | -0.200 | 23  | 0.6  | -0.002 | 245 | 5.7  | -0.016 |
| <i>Puccinellia distans</i>     | 273 | 51.5  | 0.054  | 305 | 7.9  | 0.200  |     |      |        | 93  | 17.1 | 0.055  |
| <i>Puccinellia fasciculata</i> | 298 | 46.7  | 0.006  |     |      |        |     |      |        |     |      |        |
| <i>Pulicaria dysenterica</i>   | 47  | 5.5   | 0.014  | 315 | 20.1 | 0.027  | 224 | 18.4 | -0.022 |     |      |        |
| <i>Pulmonaria longifolia</i>   | 179 | 83.4  | 0.000  |     |      |        |     |      |        |     |      |        |
| <i>Pyrola media</i>            |     |       |        |     |      |        |     |      |        | 13  | 56.7 | -0.017 |
| <i>Pyrola minor</i>            |     |       |        |     |      |        |     |      |        | 9   | 12.4 | -0.008 |
| <i>Quercus petraea</i>         | 253 | 23.3  | -0.064 | 327 | 13.6 | -0.115 | 140 | 6.4  | -0.083 | 197 | 9.8  | -0.054 |
| <i>Quercus robur</i>           | 256 | 1.8   | 0.048  | 158 | 1.2  | 0.119  | 140 | 2.7  | -0.096 | 145 | 5.0  | -0.011 |
| <i>Radiola linoides</i>        | 230 | 117.2 | 0.005  |     |      |        | 356 | 2.6  | 0.075  | 27  | 3.8  | -0.015 |
| <i>Ranunculus acris</i>        | 246 | 1.7   | -0.006 | 101 | 0.5  | -0.032 | 20  | 2.1  | -0.055 | 240 | 0.3  | -0.009 |
| <i>Ranunculus auricomus</i>    | 176 | 7.4   | -0.041 | 245 | 13.0 | -0.017 | 240 | 33.5 | -0.076 | 140 | 49.4 | -0.027 |
| <i>Ranunculus bulbosus</i>     | 253 | 3.4   | 0.041  | 96  | 1.8  | 0.031  | 264 | 3.7  | -0.104 | 74  | 4.5  | -0.001 |
| <i>Ranunculus flammula</i>     | 228 | 6.5   | -0.029 | 330 | 3.9  | -0.190 | 318 | 2.1  | 0.075  | 286 | 1.9  | 0.009  |
| <i>Ranunculus hederaceus</i>   | 247 | 38.8  | 0.007  | 118 | 1.8  | -0.032 | 136 | 1.1  | 0.105  | 168 | 16.5 | -0.017 |
| <i>Ranunculus lingua</i>       | 52  | 2.7   | 0.021  | 354 | 2.1  | 0.034  |     |      |        | 146 | 32.1 | 0.001  |
| <i>Ranunculus omiophyllus</i>  | 237 | 76.5  | -0.031 | 119 | 7.5  | -0.065 | 4   | 19.9 | -0.034 |     |      |        |
| <i>Ranunculus parviflorus</i>  | 240 | 32.1  | 0.030  |     |      |        |     |      |        |     |      |        |
| <i>Ranunculus repens</i>       | 12  | 0.1   | 0.005  | 350 | 1.4  | 0.012  | 30  | 0.0  | 0.006  | 158 | 0.2  | 0.001  |
| <i>Ranunculus sardous</i>      | 301 | 38.2  | 0.018  |     |      |        |     |      |        |     |      |        |
| <i>Ranunculus sceleratus</i>   | 28  | 1.6   | -0.027 | 164 | 10.1 | 0.164  | 193 | 2.9  | -0.002 | 22  | 8.2  | 0.002  |
| <i>Raphanus raphanistrum</i>   | 80  | 6.7   | 0.057  | 195 | 5.8  | -0.021 | 259 | 1.1  | 0.058  | 86  | 1.6  | -0.012 |
| <i>Reseda lutea</i>            | 103 | 5.5   | -0.051 | 21  | 5.8  | 0.033  |     |      |        | 74  | 10.6 | -0.008 |
| <i>Rhamnus cathartica</i>      | 59  | 17.9  | -0.014 | 96  | 0.8  | 0.040  |     |      |        |     |      |        |
| <i>Rhinanthus minor</i>        | 323 | 2.0   | -0.040 | 321 | 10.9 | -0.124 | 334 | 1.2  | 0.057  | 7   | 8.6  | 0.014  |
| <i>Rhynchospora alba</i>       | 212 | 60.2  | -0.004 |     |      |        | 215 | 1.5  | 0.005  | 292 | 15.4 | 0.000  |
| <i>Rhynchospora fusca</i>      | 192 | 36.7  | -0.002 |     |      |        |     |      |        |     |      |        |
| <i>Ribes alpinum</i>           |     |       |        | 211 | 4.5  | 0.003  |     |      |        |     |      |        |
| <i>Ribes rubrum</i>            | 183 | 3.2   | 0.019  | 281 | 1.8  | 0.112  | 21  | 2.6  | -0.089 | 71  | 4.3  | -0.001 |
| <i>Rorippa amphibia</i>        | 228 | 21.3  | -0.023 | 168 | 86.8 | 0.016  |     |      |        |     |      |        |
| <i>Rorippa palustris</i>       | 84  | 6.4   | 0.000  | 18  | 0.3  | 0.039  | 253 | 4.2  | -0.058 | 41  | 8.4  | -0.018 |
| <i>Rorippa sylvestris</i>      | 94  | 10.0  | -0.015 | 338 | 21.3 | 0.038  | 85  | 1.2  | -0.062 | 134 | 42.4 | -0.027 |
| <i>Rosa arvensis</i>           | 242 | 4.6   | 0.003  | 181 | 26.9 | 0.108  | 288 | 3.2  | -0.079 |     |      |        |
| <i>Rosa caesia</i>             | 16  | 9.1   | 0.005  | 198 | 12.6 | 0.021  |     |      |        | 336 | 14.9 | -0.112 |
| <i>Rosa micrantha</i>          | 169 | 17.3  | 0.033  |     |      |        |     |      |        |     |      |        |
| <i>Rosa obtusifolia</i>        | 136 | 8.7   | 0.008  |     |      |        |     |      |        |     |      |        |
| <i>Rosa sherardii</i>          | 275 | 67.2  | 0.008  | 240 | 5.6  | 0.027  | 354 | 4.8  | 0.027  | 328 | 3.3  | 0.014  |
| <i>Rosa spinosissima</i>       | 147 | 2.4   | 0.002  | 352 | 3.9  | 0.011  | 135 | 4.3  | 0.030  | 234 | 2.8  | 0.027  |
| <i>Rosa stylosa</i>            | 174 | 14.9  | 0.016  |     |      |        |     |      |        |     |      |        |
| <i>Rosa tomentosa</i>          | 49  | 17.5  | 0.016  |     |      |        |     |      |        |     |      |        |
| <i>Rubia peregrina</i>         | 237 | 166.7 | 0.009  |     |      |        | 242 | 3.7  | 0.014  |     |      |        |
| <i>Rubus caesius</i>           | 70  | 42.8  | 0.052  | 87  | 7.8  | 0.055  | 205 | 15.8 | -0.001 |     |      |        |
| <i>Rubus chamaemorus</i>       |     |       |        | 327 | 92.8 | 0.010  |     |      |        | 178 | 63.1 | -0.072 |
| <i>Rubus idaeus</i>            | 64  | 2.2   | -0.063 | 336 | 6.3  | -0.056 | 28  | 10.5 | -0.135 | 121 | 4.1  | -0.019 |
| <i>Rubus saxatilis</i>         |     |       |        |     |      |        |     |      |        | 217 | 1.7  | -0.031 |
| <i>Rumex acetosa</i>           | 67  | 1.8   | -0.007 | 324 | 1.6  | -0.066 | 345 | 0.3  | 0.005  | 53  | 0.4  | -0.016 |
| <i>Rumex acetosella</i>        | 200 | 0.8   | -0.055 | 270 | 3.1  | -0.260 | 9   | 1.3  | 0.078  | 170 | 0.8  | -0.093 |
| <i>Rumex conglomeratus</i>     | 98  | 2.5   | -0.092 | 160 | 9.1  | 0.137  | 308 | 1.7  | 0.011  | 4   | 36.4 | -0.008 |

|                            |     |       |        |     |      |        |     |      |        |     |      |        |
|----------------------------|-----|-------|--------|-----|------|--------|-----|------|--------|-----|------|--------|
| Rumex crispus              | 67  | 4.6   | 0.011  | 338 | 2.2  | 0.077  | 327 | 0.8  | 0.086  | 344 | 0.9  | 0.032  |
| Rumex hydrolapathum        | 42  | 17.2  | 0.010  | 198 | 13.6 | 0.054  | 27  | 30.4 | -0.018 |     |      |        |
| Rumex longifolius          |     |       |        | 351 | 2.6  | 0.017  |     |      |        | 31  | 32.4 | 0.056  |
| Rumex maritimus            | 232 | 71.6  | -0.006 | 179 | 1.5  | 0.009  |     |      |        |     |      |        |
| Rumex obtusifolius         | 357 | 0.6   | 0.011  | 344 | 3.1  | 0.057  | 11  | 0.4  | 0.025  | 352 | 5.2  | 0.051  |
| Rumex palustris            | 63  | 9.8   | 0.001  |     |      |        |     |      |        |     |      |        |
| Rumex pulcher              | 218 | 13.6  | 0.023  |     |      |        |     |      |        |     |      |        |
| Rumex sanguineus           | 101 | 3.3   | 0.105  | 0   | 1.3  | 0.194  | 99  | 1.6  | -0.045 | 160 | 25.9 | 0.027  |
| Ruscus aculeatus           | 268 | 10.2  | 0.062  |     |      |        |     |      |        |     |      |        |
| Sagina apetala             | 93  | 5.9   | 0.086  | 360 | 0.7  | 0.081  | 358 | 7.0  | 0.093  | 63  | 4.2  | 0.033  |
| Sagina nodosa              | 68  | 12.6  | 0.004  | 314 | 12.5 | -0.014 | 63  | 1.0  | 0.056  | 1   | 3.2  | 0.014  |
| Sagina procumbens          | 143 | 1.1   | 0.082  | 311 | 10.9 | -0.024 | 1   | 2.4  | 0.090  | 348 | 5.4  | 0.017  |
| Sagina subulata            | 65  | 129.1 | 0.008  |     |      |        | 310 | 53.5 | 0.004  | 305 | 7.9  | 0.032  |
| Sagittaria sagittifolia    | 213 | 10.0  | -0.009 | 161 | 63.4 | 0.029  |     |      |        |     |      |        |
| Salix aurita               | 253 | 54.7  | -0.040 | 334 | 18.6 | -0.043 | 273 | 1.7  | -0.014 | 241 | 4.7  | 0.005  |
| Salix caprea               | 80  | 8.9   | -0.048 | 330 | 1.6  | -0.083 | 154 | 5.9  | -0.185 | 142 | 4.7  | 0.042  |
| Salix cinerea              | 73  | 1.8   | 0.050  | 196 | 0.8  | 0.049  | 144 | 0.3  | 0.043  | 135 | 4.3  | 0.032  |
| Salix herbacea             |     |       |        |     |      |        |     |      |        | 251 | 24.4 | 0.003  |
| Salix lapponum             |     |       |        |     |      |        |     |      |        | 133 | 4.4  | 0.005  |
| Salix myrsinifolia         |     |       |        |     |      |        |     |      |        | 208 | 20.9 | 0.009  |
| Salix myrsinites           |     |       |        |     |      |        |     |      |        | 314 | 0.3  | 0.010  |
| Salix pentandra            | 55  | 41.3  | 0.008  | 6   | 0.8  | -0.007 |     |      |        | 15  | 7.1  | 0.007  |
| Salix phylicifolia         |     |       |        | 10  | 3.5  | 0.013  |     |      |        | 176 | 3.7  | 0.011  |
| Salix purpurea             | 55  | 14.0  | 0.009  | 345 | 6.9  | 0.027  |     |      |        | 88  | 4.9  | 0.006  |
| Salix repens               | 144 | 17.1  | -0.005 | 117 | 14.1 | -0.038 | 256 | 2.7  | 0.081  | 181 | 9.8  | 0.019  |
| Salsola kali               | 57  | 97.5  | 0.003  |     |      |        |     |      |        | 334 | 3.0  | 0.003  |
| Salvia pratensis           | 358 | 2.3   | 0.001  |     |      |        |     |      |        |     |      |        |
| Salvia verbenaca           | 296 | 5.9   | 0.001  |     |      |        |     |      |        |     |      |        |
| Sambucus nigra             | 58  | 0.2   | 0.012  | 337 | 9.8  | 0.075  | 234 | 1.4  | -0.022 | 309 | 19.2 | 0.038  |
| Samolus valerandi          | 311 | 11.6  | 0.006  | 84  | 1.9  | 0.024  | 281 | 8.0  | 0.084  | 228 | 39.8 | -0.003 |
| Sanguisorba officinalis    | 320 | 26.2  | 0.002  | 334 | 13.3 | -0.100 | 161 | 4.8  | -0.076 |     |      |        |
| Sanicula europaea          | 232 | 23.4  | -0.066 | 315 | 24.5 | -0.037 | 39  | 7.7  | -0.150 | 179 | 1.5  | 0.038  |
| Saussurea alpina           |     |       |        |     |      |        |     |      |        | 289 | 16.9 | 0.013  |
| Saxifraga aizoides         |     |       |        |     |      |        |     |      |        | 46  | 3.0  | 0.033  |
| Saxifraga granulata        | 51  | 17.7  | -0.014 | 335 | 2.3  | 0.005  |     |      |        | 98  | 29.6 | 0.012  |
| Saxifraga hypnoides        |     |       |        | 26  | 1.1  | 0.001  |     |      |        | 186 | 16.4 | 0.002  |
| Saxifraga nivalis          |     |       |        |     |      |        |     |      |        | 276 | 3.6  | -0.001 |
| Saxifraga oppositifolia    |     |       |        |     |      |        |     |      |        | 167 | 6.8  | 0.017  |
| Saxifraga stellaris        |     |       |        |     |      |        |     |      |        | 224 | 17.9 | 0.011  |
| Saxifraga tridactylites    | 252 | 3.2   | 0.019  | 262 | 0.7  | -0.008 | 181 | 11.6 | 0.038  |     |      |        |
| Scabiosa columbaria        | 212 | 10.6  | -0.015 | 344 | 6.4  | -0.002 |     |      |        |     |      |        |
| Schedonorus arundinaceus   | 114 | 1.2   | 0.095  | 169 | 2.5  | 0.192  | 308 | 3.3  | 0.012  | 68  | 4.2  | 0.045  |
| Schedonorus giganteus      | 178 | 1.8   | -0.032 | 295 | 4.4  | -0.019 | 18  | 2.3  | -0.222 | 45  | 6.9  | 0.034  |
| Schedonorus pratensis      | 58  | 7.0   | -0.081 | 66  | 1.7  | -0.014 | 214 | 2.1  | -0.101 | 125 | 7.3  | 0.047  |
| Schoenoplectus lacustris   | 306 | 3.3   | -0.007 | 330 | 26.9 | -0.005 |     |      |        | 175 | 6.4  | 0.015  |
| Schoenoplectus tabernaemon | 271 | 78.3  | 0.007  | 28  | 0.6  | 0.044  | 227 | 7.6  | 0.069  | 29  | 3.5  | 0.005  |
| Schoenus nigricans         | 45  | 19.6  | 0.003  |     |      |        | 333 | 52.8 | 0.005  | 336 | 37.7 | 0.022  |
| Scilla autumnalis          | 77  | 23.7  | -0.001 |     |      |        |     |      |        |     |      |        |
| Scilla verna               | 181 | 5.8   | -0.010 |     |      |        | 293 | 27.4 | 0.015  | 3   | 18.9 | 0.017  |
| Scirpus sylvaticus         | 168 | 24.2  | 0.003  | 245 | 4.2  | 0.007  | 177 | 3.8  | -0.018 | 156 | 67.1 | 0.014  |

|                                  |     |       |        |     |      |        |     |      |        |      |        |        |
|----------------------------------|-----|-------|--------|-----|------|--------|-----|------|--------|------|--------|--------|
| <i>Scleranthus annuus</i>        | 86  | 14.7  | -0.017 |     |      |        |     |      | 155    | 19.8 | -0.005 |        |
| <i>Scorzoneroides autumnalis</i> | 59  | 2.5   | -0.027 | 128 | 1.4  | 0.052  | 8   | 0.9  | -0.020 | 350  | 2.3    | -0.018 |
| <i>Scrophularia auriculata</i>   | 289 | 0.7   | -0.048 | 263 | 3.2  | 0.169  | 194 | 2.2  | -0.098 |      |        |        |
| <i>Scrophularia nodosa</i>       | 227 | 5.0   | -0.011 | 306 | 12.4 | -0.036 | 91  | 1.0  | -0.050 | 177  | 4.5    | -0.004 |
| <i>Scrophularia umbrosa</i>      | 51  | 17.6  | 0.003  |     |      |        |     |      |        | 118  | 23.5   | 0.000  |
| <i>Scutellaria galericulata</i>  | 216 | 3.9   | 0.009  | 216 | 11.0 | 0.024  | 37  | 25.2 | 0.040  | 228  | 2.6    | 0.043  |
| <i>Scutellaria minor</i>         | 232 | 90.1  | -0.004 |     |      |        | 47  | 9.4  | 0.051  | 273  | 24.1   | -0.014 |
| <i>Sedum acre</i>                | 72  | 4.2   | -0.010 | 15  | 2.5  | 0.033  | 189 | 8.2  | -0.040 |      |        |        |
| <i>Sedum anglicum</i>            | 237 | 88.8  | -0.011 | 3   | 3.3  | 0.001  | 50  | 1.5  | 0.022  | 259  | 8.6    | -0.031 |
| <i>Sedum forsterianum</i>        | 80  | 3.5   | -0.007 |     |      |        | 90  | 1.8  | -0.080 |      |        |        |
| <i>Sedum rosea</i>               |     |       |        |     |      |        |     |      |        | 313  | 35.9   | 0.004  |
| <i>Sedum telephium</i>           | 101 | 6.2   | -0.001 | 147 | 1.9  | 0.009  | 12  | 0.8  | -0.047 | 341  | 17.1   | -0.023 |
| <i>Sedum villosum</i>            |     |       |        |     |      |        |     |      |        | 196  | 36.8   | -0.004 |
| <i>Selaginella selaginoides</i>  |     |       |        | 322 | 3.3  | 0.003  | 352 | 81.4 | 0.004  | 336  | 19.5   | -0.029 |
| <i>Senecio aquaticus</i>         | 243 | 37.6  | -0.063 | 69  | 2.0  | -0.122 | 139 | 3.0  | -0.018 | 338  | 5.2    | -0.001 |
| <i>Senecio erucifolius</i>       | 99  | 10.5  | 0.000  | 118 | 9.6  | 0.056  | 239 | 12.4 | -0.026 |      |        |        |
| <i>Senecio jacobaea</i>          | 76  | 3.3   | -0.039 | 355 | 0.9  | 0.052  | 63  | 1.5  | 0.140  | 149  | 2.4    | -0.024 |
| <i>Senecio sylvaticus</i>        | 75  | 11.0  | -0.024 | 258 | 2.4  | -0.004 | 165 | 7.2  | 0.089  | 96   | 7.2    | -0.034 |
| <i>Senecio vulgaris</i>          | 70  | 5.4   | -0.001 | 343 | 4.4  | -0.007 | 296 | 0.6  | -0.088 | 14   | 11.1   | -0.006 |
| <i>Serratula tinctoria</i>       | 345 | 18.0  | -0.030 | 336 | 11.0 | 0.010  | 334 | 15.1 | -0.064 |      |        |        |
| <i>Sesleria caerulea</i>         |     |       |        | 310 | 53.3 | 0.009  |     |      |        |      |        |        |
| <i>Sherardia arvensis</i>        | 142 | 2.6   | -0.099 | 298 | 2.4  | 0.031  | 170 | 10.4 | 0.031  | 151  | 3.4    | -0.001 |
| <i>Sibbaldia procumbens</i>      |     |       |        |     |      |        |     |      |        | 157  | 1.1    | -0.001 |
| <i>Sibthorpia europaea</i>       | 243 | 75.0  | -0.006 |     |      |        |     |      |        |      |        |        |
| <i>Silaum silaus</i>             | 105 | 10.2  | -0.016 | 23  | 4.7  | -0.011 |     |      |        |      |        |        |
| <i>Silene acaulis</i>            |     |       |        |     |      |        |     |      |        | 241  | 21.2   | -0.004 |
| <i>Silene conica</i>             | 56  | 92.0  | -0.001 |     |      |        |     |      |        |      |        |        |
| <i>Silene dioica</i>             | 238 | 2.4   | -0.031 | 43  | 2.0  | 0.022  | 337 | 3.3  | -0.083 | 47   | 8.8    | -0.033 |
| <i>Silene flos-cuculi</i>        | 326 | 1.0   | -0.054 | 302 | 9.8  | -0.117 | 240 | 3.8  | 0.029  | 103  | 1.5    | -0.007 |
| <i>Silene vulgaris</i>           | 62  | 32.6  | -0.037 | 17  | 10.9 | -0.040 | 137 | 0.6  | 0.033  | 310  | 14.1   | -0.022 |
| <i>Sison amomum</i>              | 173 | 12.8  | -0.062 |     |      |        |     |      |        |      |        |        |
| <i>Sium latifolium</i>           | 62  | 67.0  | 0.005  |     |      |        |     |      |        |      |        |        |
| <i>Solanum dulcamara</i>         | 67  | 4.7   | -0.051 | 177 | 13.6 | 0.170  | 320 | 7.8  | 0.036  | 117  | 11.0   | -0.017 |
| <i>Solanum nigrum</i>            | 86  | 4.3   | -0.116 | 22  | 0.7  | 0.118  | 11  | 8.7  | 0.143  |      |        |        |
| <i>Solidago virgaurea</i>        | 231 | 55.0  | -0.031 | 323 | 15.2 | -0.053 | 298 | 1.2  | -0.003 | 162  | 7.6    | -0.030 |
| <i>Sonchus arvensis</i>          | 72  | 16.4  | -0.049 | 320 | 14.2 | 0.050  | 321 | 5.6  | -0.016 | 42   | 6.7    | -0.002 |
| <i>Sonchus asper</i>             | 72  | 2.5   | -0.027 | 312 | 3.8  | 0.105  | 183 | 1.9  | 0.011  | 345  | 10.5   | -0.122 |
| <i>Sonchus oleraceus</i>         | 83  | 3.8   | 0.005  | 309 | 4.9  | 0.141  | 235 | 1.2  | 0.043  | 332  | 16.1   | -0.042 |
| <i>Sonchus palustris</i>         | 57  | 112.1 | 0.008  |     |      |        |     |      |        |      |        |        |
| <i>Sorbus aria</i>               | 286 | 11.6  | -0.053 | 26  | 2.1  | 0.064  | 142 | 2.2  | 0.061  | 235  | 12.6   | 0.000  |
| <i>Sorbus aucuparia</i>          | 71  | 7.6   | -0.074 | 312 | 8.2  | -0.078 | 53  | 3.1  | -0.071 | 224  | 1.9    | -0.019 |
| <i>Sorbus devoniensis</i>        | 67  | 151.2 | 0.002  |     |      |        |     |      |        |      |        |        |
| <i>Sorbus torminalis</i>         | 192 | 15.9  | 0.005  |     |      |        |     |      |        |      |        |        |
| <i>Sparganium angustifolium</i>  |     |       |        |     |      |        | 346 | 52.0 | 0.025  | 258  | 2.9    | -0.005 |
| <i>Sparganium emersum</i>        | 230 | 18.6  | -0.015 | 182 | 26.8 | 0.045  | 169 | 19.3 | -0.003 | 139  | 10.9   | -0.014 |
| <i>Sparganium erectum</i>        | 291 | 3.3   | -0.008 | 131 | 0.2  | 0.165  | 185 | 6.5  | 0.043  | 98   | 9.0    | -0.004 |
| <i>Sparganium natans</i>         |     |       |        |     |      |        |     |      |        | 298  | 4.0    | -0.009 |
| <i>Spergula arvensis</i>         | 76  | 8.5   | -0.016 | 267 | 0.9  | -0.157 | 316 | 2.9  | 0.037  | 311  | 1.4    | -0.017 |
| <i>Spergularia marina</i>        | 18  | 32.8  | -0.077 | 96  | 15.1 | 0.164  | 196 | 0.5  | 0.062  | 60   | 12.0   | -0.097 |
| <i>Spergularia rubra</i>         | 235 | 10.0  | -0.032 | 208 | 16.8 | 0.003  | 329 | 1.7  | 0.064  | 46   | 6.7    | -0.033 |





|                               |     |      |        |     |      |        |        |      |        |        |      |        |
|-------------------------------|-----|------|--------|-----|------|--------|--------|------|--------|--------|------|--------|
| <i>Vicia orobus</i>           |     |      |        |     | 207  | 6.1    | -0.023 | 219  | 7.9    | -0.002 |      |        |
| <i>Vicia parviflora</i>       | 243 | 27.9 | -0.004 |     |      |        |        |      |        |        |      |        |
| <i>Vicia sativa</i>           | 128 | 3.0  | -0.086 | 154 | 10.0 | 0.079  | 291    | 1.3  | -0.023 | 38     | 8.8  | -0.049 |
| <i>Vicia sepium</i>           | 230 | 8.3  | -0.054 | 101 | 1.2  | -0.092 | 40     | 6.3  | -0.173 | 332    | 2.1  | -0.004 |
| <i>Vicia sylvatica</i>        | 270 | 4.6  | -0.015 | 191 | 24.7 | -0.012 |        |      |        | 189    | 7.4  | -0.029 |
| <i>Vicia tetrasperma</i>      | 95  | 8.4  | -0.040 | 342 | 2.7  | 0.113  |        |      |        |        |      |        |
| <i>Viola canina</i>           | 67  | 12.8 | 0.003  | 47  | 3.9  | 0.014  | 128    | 26.2 | 0.016  | 23     | 28.2 | -0.028 |
| <i>Viola hirta</i>            | 165 | 5.8  | -0.014 | 52  | 1.1  | -0.014 |        |      |        |        |      |        |
| <i>Viola lactea</i>           | 225 | 87.2 | -0.007 |     |      |        |        |      |        |        |      |        |
| <i>Viola lutea</i>            |     |      |        | 6   | 3.1  | -0.012 | 88     | 3.5  | -0.007 | 36     | 8.9  | -0.016 |
| <i>Viola odorata</i>          | 78  | 11.0 | -0.129 | 337 | 1.6  | 0.053  | 260    | 16.4 | -0.087 | 58     | 5.6  | -0.008 |
| <i>Viola palustris</i>        | 237 | 81.7 | -0.037 | 142 | 12.7 | -0.111 | 33     | 5.5  | -0.037 | 225    | 2.6  | -0.019 |
| <i>Viola reichenbachiana</i>  | 170 | 5.3  | -0.058 | 301 | 23.0 | -0.032 | 146    | 1.8  | 0.019  |        |      |        |
| <i>Viola riviniana</i>        | 208 | 3.1  | -0.004 | 330 | 14.8 | -0.086 | 338    | 2.9  | -0.013 | 325    | 0.2  | -0.019 |
| <i>Viola tricolor</i>         | 66  | 11.8 | -0.010 | 277 | 10.2 | 0.000  |        |      |        | 29     | 16.8 | -0.024 |
| <i>Viscum album</i>           | 253 | 6.4  | -0.062 |     |      |        |        |      |        |        |      |        |
| <i>Vulpia bromoides</i>       | 160 | 3.6  | -0.057 | 337 | 5.0  | 0.045  | 6      | 20.9 | 0.071  | 84     | 1.3  | -0.017 |
| <i>Vulpia ciliata</i>         | 136 | 37.5 | 0.003  |     |      |        |        |      |        |        |      |        |
| <i>Wahlenbergia hederacea</i> | 249 | 69.4 | -0.002 |     |      |        | 243    | 10.0 | 0.002  |        |      |        |
| <i>Wolffia arrhiza</i>        | 225 | 82.2 | -0.001 |     |      |        |        |      |        |        |      |        |
| <i>Zannichellia palustris</i> | 245 | 22.7 | -0.017 | 82  | 1.3  | 0.017  | 237    | 16.1 | 0.015  | 93     | 16.9 | -0.002 |
